# 1 Structural and functional characterization of allatostatin receptor type-C 2 of *Thaumetopoea pityocampa* revealed the importance of Q271<sup>6.55</sup> residue in 3 G protein-dependent activation pathway

4 Aida Shahraki<sup>1</sup>, Ali Isbilir<sup>2,4</sup>, Berna Dogan<sup>3</sup>, Martin J. Lohse<sup>2,4,5</sup>, Serdar Durdagi<sup>3,\*</sup>, Necla  
5 Birgul-Iyison<sup>1,\*</sup>

6 <sup>1</sup>Department of Molecular Biology and Genetics, Bogazici University, 34342 Bebek-Istanbul, Turkey

7 <sup>2</sup>Max Delbrück Center for Molecular Medicine in Helmholtz Association, 13125, Berlin, Germany

8 <sup>3</sup>Department of Biophysics, School of Medicine, Bahcesehir University, Goztepe, 34734 Istanbul, Turkey

9 <sup>4</sup>Institute of Pharmacology and Toxicology, University of Würzburg, Würzburg 97078, Germany

10 <sup>5</sup>ISAR Bioscience Institute, Planegg/Munich, 82152, Germany

11

12

---

## 13 Abstract

14 Insect neuropeptide receptors are among the potential targets for designing next-generation pesticides.  
15 Activation of allatostatin receptor type C (AstR-C), a G Protein-coupled receptor (GPCR), upon  
16 stimulation with its endogenous ligand, allatostatin C (AST-C), leads to the inhibition of juvenile hormone  
17 (JH) secretion that consequently regulates physiology of insects. Here we conducted *in silico* and *in vitro*  
18 approaches to characterize the structure and function of AstR-C of *Thaumetopoea pityocampa* (*T.pit*), a well-  
19 known pest in Mediterranean countries. The sequence of AstR-C and AST-C were derived from whole  
20 genome sequencing (WGS) data. Resonance energy transfer (RET) methods were used to investigate the  
21 downstream effectors of the receptor and the temporal kinetics of G protein activation. Three-  
22 dimensional (3D) structure of AstR-C constructed via homology modeling methods was subjected to  
23 molecular dynamics (MD) simulations and docking studies to identify the orthosteric pocket. Our results  
24 showed that *T.pit* AstR-C couples to G $\alpha$ i/o subtype of G proteins at sub-nanomolar ranges of the the  
25 ligand with the G protein recruitment and activation kinetics of ~4 and 6 seconds, respectively, when 1  
26 nM AST-C is administered. At the increasing concentration of native ligand,  $\beta$ arrestin was shown to be  
27 recruited at nanomolar ranges the ligand. Docking and MD simulation studies revealed the importance of  
28 extracellular loop 2 (ECL2) in *T.pit* AstRC/AST-C interaction, and combination of *in silico* and *in vitro*  
29 methods supported the accuracy of the built model and the predicted orthosteric pocket. Q271<sup>6.55</sup>  
30 (Ballesteros-Weinstein generic numbering) was found to have a substantial role in G protein dependent  
31 activation of AstR-C possibly via contributing to the flexibility of the structure.

---

32 **Keywords:** GPCR, insect neuropeptide receptor, RET-based assays, MD Simulation, Molecular docking  
33 studies, *Thaumetopoea pityocampa*

34

35

36

37 \*Corresponding authors: [birgul@boun.edu.tr](mailto:birgul@boun.edu.tr) (NBI); [serdar.durdagi@med.bau.edu.tr](mailto:serdar.durdagi@med.bau.edu.tr) (SD)

## 38 1. Introduction

39 Allatostatins (ASTs), are pleiotropic peptides abundant in arthropods. Allatostatin C (AST-C) is recognized  
40 by PISCF stretch of amino acids in its C-terminus. This subtype was first found in the brain of *Manduca*  
41 *sexta* that belongs to Lepidoptera family<sup>1</sup>. ASTs play a crucial role in modulating the physiology of insects  
42 and crustacean species due to their inhibitory effect on the synthesis of juvenile hormone (JH)<sup>2</sup>.  
43 Phenotypic traits, physiological and developmental processes of insects are dominated by this lipid-like  
44 hormone<sup>3</sup>. AST-C exert its downstream effect upon binding to the cognate receptor which belongs to G  
45 protein-coupled receptors (GPCRs). Thus, neuropeptide GPCRs are proposed as ideal targets for the  
46 development of novel anti-parasite agents and insecticides in veterinary medicine and agriculture<sup>4</sup>. GPCRs  
47 are seven-transmembrane-domain (TM) proteins present in different organisms from bacteria to fungi and  
48 animals responding to a plethora of extracellular stimulations<sup>5</sup>. Human GPCRs are under extensive  
49 investigation because of their importance in drug discovery studies. But insect GPCRs despite their  
50 significance in proposing new mode-of-action for the development of next generation pesticides have not  
51 been studied well and overlooked<sup>6, 7</sup>. Characterization of novel GPCRs in insects by investigating their  
52 structure, downstream effectors and binding pocket can provide valuable information that can be utilized  
53 for developing new molecules targeting neuropeptide receptors of insects and controlling the physiological  
54 processes of harmful insects.

55 *Thaumetopoea pityocampa* (*T.pit*) (Lepidoptera: Thaumetopoeidae), pine processionary moth, is one of the  
56 most serious pests residing in South Europe, North Africa and Mediterranean countries<sup>8</sup>. This insects feed  
57 from the leaves of pine trees and their outbreaks can cause severe defoliation of pine forests. Gregarious,  
58 urticating larvae are responsible for severe public and animal health concern as they can cause dermatitis  
59 and other severe allergic responses<sup>9, 10</sup>.

60 In this study, our aim was to characterize the structure and function of *T.pit* allatostatin receptor type C  
61 (AstR-C). To this goal, the sequence of AstR-C and its endogenous ligand, AST-C, were derived from  
62 whole genome sequencing (WGS) data of *T.pit* that is sequenced and analyzed in our lab for the first time.  
63 Förster- and bioluminescence resonance energy transfer (FRET and BRET) methods were used to  
64 investigate the downstream effectors of the receptor. The structures of AstR-C and AST-C were  
65 investigated using state-of-the-art *in silico* approaches. The orthosteric pocket of the receptor was identified  
66 combining molecular dynamics (MD) simulations and docking studies, and it was further validated by *in*  
67 *silico* and *in vitro* approaches. Q271 at 6.55 position (Ballesteros-Weinstein numbering)<sup>11</sup> was identified to  
68 have profound effect on the activation of the receptor and MD simulations analysis revealed its  
69 importance on the flexibility of the structure.

## 70 2. Results and Discussion

71 **2.1. *T.pit* AST-C.** Sequence of *T.pit* AST-C was derived from the WGS data that is deposited in NCBI  
72 (*Thaumetopoea pityocampa* ASH\_NBICSL\_2017, Accession number of the assembled genome:  
73 WUAW00000000). The gene contained two introns that were removed and translated into the precursor  
74 protein. The obtained sequence was compared to AST-C preprohormone of other species (Supplementary  
75 Figure S1, panel A). The precursor neuropeptide needed to be further processed to obtain the mature  
76 peptide as neuropeptides in insects are produced as long precursors that process in the endoplasmic  
77 reticulum to make the bioactive peptide. In general, one precursor can results in different mature  
78 peptides<sup>12</sup>, but in case of AST-C, only one peptide produces from the precursor<sup>2</sup>. SignalP-5.0 was used to  
79 identify the signal peptide, and dibasic cleavage of the preprohormone was determined according to the  
80 rules provided by Veenstra<sup>13</sup> (Supplementary Figure S1, panel B). The final neuropeptide was a 15 amino

81 acids long peptide with sequence of QVRFRCYFNPISCF. Glutamine in the N-terminus was converted  
82 to pyroglutamate based on the known post-translational modifications of AST-C<sup>14</sup>. The sequence of the  
83 mature AST-C was compared with other lepidopteran and the sequences were found to be 100% identical  
84 <sup>1, 15, 16</sup>.

85 AST-C is a relatively larger peptide that could fold into specific conformations and adopt secondary  
86 conformations. However, for many molecular modeling programs predicting the structure of such a large  
87 peptide from beginning (*ab initio*) could be challenging and most likely inconclusive. Hence, instead of  
88 trying to construct the 3D structure of Ast-C using modeling programs, homology modeling was  
89 performed using I-TASSER to obtain the structure of the ligand. Based on the known structural  
90 characteristics of the peptide, some particular considerations were considered in the modeling procedure.  
91 For instance, there is a structurally and functionally important disulfide bond between the 7<sup>th</sup> and 14<sup>th</sup>  
92 cysteine residues of AST-C<sup>14</sup> and this bond was introduced in the final model by setting the distance  
93 restraint of 2.05 Å (i.e., the required distance for the formation of disulfide bond) between the two sulfur  
94 atoms. The constructed model showed a C-score of -1.16. C-score is the scoring system used by I-  
95 TASSER, and values higher than -1.5 are expected to possess the more probable folding of the protein<sup>17</sup>  
96 so the constructed model here was in the acceptable range. The final structure of the ligand was modified  
97 in the N-terminus, converting glutamine to pyroglutamate (Supplementary Figure S2). Unfortunately, no  
98 structural data for AST-C is available in databases so we could not validate the accuracy of our model, but  
99 exerting many homology modeling runs with the already explained constrains all resulted in a turn-like  
.00 secondary structure of AST-C.

.01 **2.2. *T.pit* AstR-C belongs to Class A GPCRs.** Sequence of the receptor was derived from the WGS  
.02 data of *T.pit* as well. Investigating the sequence of the receptor in pfam online tool<sup>18</sup>, it was found that it  
.03 belongs to seven transmembrane rhodopsin family GPCRs (Supplementary Figure S3, panel A). AstR-C  
.04 possesses all the conserved residues and motifs available in class A GPCRs (Supplementary Figure S3,  
.05 panel B). The only exception is position 6.30 (Ballesteros-Weinstein generic numbering) at which Glu  
.06 residue is substituted with a His residue. E6.30 plays an important role in the activation of class A GPCRs  
.07 as it forms an ionic lock with R3.50 and T6.34. The same exception is observed for opioid receptors as  
.08 well, but histidine substitution in these receptors is shown not to affect the activation of these receptors  
.09 since the hydrogen bond network between this residue and R3.50 and T6.34 is still present<sup>20</sup>.

.10 Subcellular localization of the receptor was determined. *T.pit* AstR-C was cloned in SYFP plasmid to fuse  
.11 the C-terminus of the receptor with yellow fluorescent protein (YFP). AstRC-SYFP construct was  
.12 transfected in HEK-TSA cells and plasma membrane and nucleus were stained. Live cell confocal  
.13 microscopy imaging showed that the fluorescence signal from YFP was predominantly co-localized with  
.14 the cell membrane marker, suggesting that *T.pit* AstR-C mainly localized in the plasma membrane (Figure  
.15 1).

.16 **2.3. Downstream Effectors of *T.pit* AstR-C.** GPCRs that are stimulated with their relevant ligand, in  
.17 turn, could activate the intracellular G protein heterotrimers<sup>5</sup>. Four subtypes of these proteins are found in  
.18 the cell, G<sub>s</sub>, G<sub>i/o</sub>, G<sub>q/12</sub> and G<sub>12/13</sub>, and each initiate a specific downstream cascade<sup>21</sup>. To understand  
.19 whether AST-C peptide can activate *T.pit* AstR-C, G protein activation assay was performed. Different  
.20 biosensors were used to find the G protein subtype that couples to the receptor. G protein FRET  
.21 biosensors were all tagged with YFP and cyan fluorescent protein (CFP) at  $\gamma$ - and  $\alpha$ -subunits, respectively  
.22 (Figure 2, panel A). FRET changes before and after application of the native ligand were measured. A  
.23 decrease in FRET signal was expected provided that the receptor couples to the relevant G protein  
.24 following the administration of the native ligand. The reduction happens since the distance between the

.25 donor (CFP) and acceptor (YFP) increases. In case of *T.pit* AstR-C, we observed a decrease in FRET  
.26 signal when  $G_{i2}$  sensors were used. Hence, it was deduced that this insect neuropeptide receptor favors to  
.27 be coupled to the  $G_i$  subtype (Figure 2, panel B). Three different  $G_i$  sensors were tested in this assay.  
.28 Results showed that all  $G_i$  sensors ( $G_{i1}$ ,  $G_{i2}$  and  $G_{i3}$ ) couple to AstR-C with an  $EC_{50}$  at sub-nanomolar  
.29 range but the highest  $\Delta$ FRET shift was observed for  $G_{i2}$  (Figure 2, panel C). Therefore, in the following  
.30 experiments  $G_{i2}$  was used.

.31 Kinetics studies were conducted at two events, G protein recruitment, and G protein activation. Kinetics  
.32 of the recruitment of G protein complex to AstR-C was investigated to evaluate how fast the G protein  
.33 complex is recruited to the receptor following a brief application of the ligand (10 second), and how long  
.34 it takes to be dissociated from the receptor after washing it off (400 seconds). To this aim, the C-terminus  
.35 of the receptor and the gamma subunit of G protein complex were tagged with YFP and CFP,  
.36 respectively. In temporal kinetics of G protein recruitment experiment the off-kinetics was best  
.37 measurable at 1 nM concentration of the native peptide, AST-C, during the total 400-seconds  
.38 measurement time. On average, a  $\tau$ -value of 4.7 and 74.1 second were yielded for the association and  
.39 dissociation of G protein to the receptor at 1 nM concentration of AST-C, respectively (Figure 2, panel  
.40 D).

.41 The kinetics of G protein activation were investigated as well to evaluate the G protein activation kinetics.  
.42 Fluorescent tags used in this experiment were identical to the ones used in G protein activation assay  
.43 (Figure 2, panel A). The experiment here shows the time that  $G_i$  protein remains active following a brief  
.44 application of the ligand (*on* kinetics, G protein activation ( $G\alpha$ - $G\beta\gamma$  subunit rearrangement/dissociation))  
.45 and the time required for the G protein to return to its basal level (*off* kinetics, G protein deactivation  
.46 (subunit rearrangement/reassociation)) when the ligand is being washed off by perfusing buffer (instead of  
.47 ligand) to the cell. Complete inactivation of G protein was observable at 1 nM concentrations with the  $\tau$ -  
.48 value of 6.2 second for *on* kinetics of and 59.3 second for off kinetics (Figure 2, panel D and Figure 2,  
.49 panel E).

.50 Non-visual arrestins,  $\beta$ arrestin1 (arrestin-2) and  $\beta$ arrestin2 (arrestin-3), are cytosolic proteins that bind  
.51 agonist stimulated receptors<sup>22</sup>. In this study,  $\beta$ arrestin2 recruitment to *T.pit* AstR-C upon the stimulation  
.52 with different concentrations of ligand was investigated using  $\beta$ arrestin with a C-terminally incorporated  
.53 nanoluciferase NanoLuc<sup>23</sup> luciferase (19 kDa; Nluc) as the donor and YFP at the C-terminus of the  
.54 receptor as the acceptor. Nluc emission happens in the presence of its substrate, furimazine (Figure 2,  
.55 panel G). This assay showed that the  $\beta$ arrestin is recruited to the receptor at nanomolar range ( $EC_{50}$  values  
.56 = 37 nM) (Figure 2, panel H).

.57 **2.4. 3D Structure of *T.pit* AstR-C.** As there is no crystal structure of AstR-C of *T.pit*, 3D homology  
.58 model of the receptor was built using SWISS-MODEL webserver (<https://swissmodel.expasy.org>).  
.59 Different templates were used to build a reliable model, and the one constructed based on Mus-musculus  
.60 Mu opioid receptor (PDB ID, 6DDE) with the resolution of 3.5 Å<sup>24</sup> was chosen as it was resolved along  
.61 with an agonist and human nucleotide-free  $G_i$  and more importantly, because the receptor was in the  
.62 active state. This active template showed 37.15% sequence identity to *T.pit* AstR-C. The constructed  
.63 model was subjected to short MD simulations (25-ns) to relax and refine the structure, and the stability of  
.64 the built model was evaluated by investigating root mean square deviations (RMSD) and root mean square  
.65 fluctuations (RMSF) observed during the MD simulation time (Supplementary Figure S4, panels A and B).  
.66 To account for the possible role of the N-terminus of the receptor in ligand binding and orthosteric  
.67 pocket formation, this part was modeled separately using I-TASSER webserver and merged with the



.68 model (Supplementary Figure S4, panel C and D). In addition, the quality of the model was evaluated by  
.69 inspecting the Ramachandran's plot (Supplementary Figure S4, panels E and F). In order to have a better  
.70 prediction regarding the binding pocket of the receptor and obtaining the most active-like conformation  
.71 of binding pocket, the final model was built as a complex of  $G_a$  and receptor in which  $\alpha$ -subunit  
.72 conformation of G protein heterotrimer was taken from the structure resolved in Mus-musculus  $\mu$ -opioid  
.73 receptor –  $G_a$ -protein complex. There were two gap regions in the resolved  $G_a$  structure which were  
.74 modeled using the Crosslink proteins module of Schrödinger based on the UniProt sequence (UniprotKB:  
.75 P63096) (Supplementary Figure S5). The final system having *T.pit* AstR-C and  $G_a$  in the intracellular  
.76 interface was subjected to three individual replicas of 500-ns MD simulations runs initiating with different  
.77 velocity distributions. The stability of the system was evaluated using RMSD and RMSF plots. RMSD and  
.78 RMSF analysis showed relatively high values that mainly stem from 36 N-terminus residues of AstR-C.  
.79 This region localizes in the extracellular matrix and is highly flexible that consequently results in the  
.80 increased values of RMSD and RMSF, but even if it was considered in the calculations, the RMSD reached  
.81 to a plateau during the MD simulation time (Supplementary Figure S6, panels A, B, C and D). Besides the  
.82 N-terminus, other parts of the receptor showed a good stability with low RMSD and RMSF fluctuations  
.83 throughout the simulations. Residues with high fluctuation values are all residing in the extracellular and  
.84 intracellular loops, ECL and ICL, respectively, and higher fluctuations for these loop regions are expected.  
.85 A part of the C-terminus that was modeled in the final model also showed high fluctuations. The structure  
.86 of  $G_a$  was also stable during the MD simulation, though being a cytosolic protein, it showed higher RMSD  
.87 values in comparison to AstR-C (Supplementary Figure S6, panels E and F).

.88 **2.5. Orthosteric binding pocket of *T.pit* AstR-C.** Molecular docking and MD simulations studies were  
.89 combined to identify the orthosteric binding pocket of the receptor. Keeping the ligand, AST-C, flexible  
.90 and the receptor rigid, protein-protein docking was performed in ClusPro webserver (<https://cluspro.org>).  
.91 1000 rotamers of AST-C were generated by the program and 946 of them clustered together in an identical  
.92 pose. The best pose with the lowest energy of  $-1621.8 \text{ kcal mol}^{-1}$  was chosen. This pose was subjected to  
.93 500-ns MD simulations. The Molecular Mechanics/Generalized Born Surface Area (MM/GBSA) analysis  
.94 was conducted for 100 frames selected from the MD simulation trajectories to calculate the binding free  
.95 energy of the ligand ( $\Delta G$ ). The average  $\Delta G$  was calculated as  $-147.92 \pm -15.88 \text{ kcal mol}^{-1}$ . The RMSD and  
.96 RMSF deviations of the receptor and the ligand throughout the MD simulation time were evaluated as  
.97 well. Two different RMSD fitting modes were considered to assess the stability of ligand AST-C. While  
.98 the first one was the RMSD with respect to the first frame of the backbone atoms of the receptor to  
.99 evaluate the translational motion of the ligand at the binding pocket, in the second fitting mode rotational  
.100 motion or in other words internal fluctuations of the ligand at binding pocket was evaluated. We denoted  
.101 the translational motion of ligand by “Lig-fit-Protein” RMSD and internal fluctuations by “Lig-fit-Ligand”  
.102 RMSD. During the first 100-ns of the simulation time, the ligand showed high deviations from the first  
.103 frame and then in the remaining time the fluctuations decreased and AST-C reached to a stable mode  
.104 which continued until the end of the simulation time (Supplementary Figure S7, panel A). RMSF values of  
.105 AstR-C showed higher fluctuation at loops, N-terminus and C- terminus, which was expected. Not  
.106 considering the N-terminus, the highest fluctuation was observed for the ECL3 (Supplementary Figure S7,  
.107 panels B and C). Except for the first 4 residues of the ligand, the ligand showed not much fluctuations and  
.108  $G_a$  RMSF values were high at the loop regions (Supplementary Figure S7, panel D and E). MD  
.109 simulations trajectories were analyzed and the interaction between the ligand and the receptor was  
.110 investigated to find the residues of AstR-C that mainly contribute to the formation of the orthosteric  
.111 pocket as well as to identify significant residues in receptor-ligand interactions (Figure 3, panel A and B).

!12 Results showed that ECL2 takes the main role in the establishment of the interaction, and residues in this  
!13 region forms one or more type of interaction with the ligand during the MD simulations time. ECL3 was  
!14 also involved in the binding site. Hydrogen bonding interactions was found to be the prevalent type of  
!15 interaction in the binding pocket, but hydrophobic interactions, salt-bridge and water bridge interactions  
!16 were also involved (Figure 3, panel C and D).

!17 To verify the binding pocket suggested by docking and MD simulations, some of the residues of the  
!18 receptor that form long-lived interactions in MD simulations with the peptide Ast-C were mutated to  
!19 Alanine (Ala) *in silico*. Additionally, a point mutation of Q271A was generated, due to the well-known  
!20 importance of 6.55 position in ligand binding in other GPCR Class A receptors<sup>25, 26, 27</sup>. 200-ns MD  
!21 simulations were run for mutant receptors at apo-form, and new docking poses were generated for all the  
!22 mutants using ClusPro server. These holo forms were then subjected to 200-ns MD simulations with and  
!23 without G<sub>s</sub> subunit. To investigate the influence of point mutations on the state of the structure i.e. being  
!24 active, inactive, or intermediate state,  $\Delta d$  was calculated according to *gpcrdb* recommended measurement in  
!25 which the distance between two pairs of residues are measured and then subtracted  
!26 (<http://docs.gpcrdb.org/structures.html>) (Table 1). In class A GPCRs,  $\Delta d$  below 2.0 Å shows a structure  
!27 at inactive state, between 2 to 7.15 Å is related to intermediate states of the structure and values higher  
!28 than 7.15 Å are attributed to structures at active state. At the apo form, wildtype (WT) receptor was found  
!29 to be in an intermediate state during the MD simulations time, however, Ala-substitution at D181 and  
!30 N182 positions moved the state toward inactive states in apo form. The mutation on residues E193A and  
!31 Q278A lead completely the opposite behavior and resulted in structures at active state. The receptor  
!32 remained at an intermediate state for N188A, Q200A and Q271A mutants. Binding of AST-C to the  
!33 receptor increased the  $\Delta d$  values in general, and expectedly, shifted the structures toward more active states  
!34 (Table 1). This was significant for WT receptor, in particular, for which binding of the ligand transitioned  
!35 the state from intermediate to active. In contrast to the general trend observed for WT and other mutant  
!36 receptors, point mutation Q271A shifted the state of the receptor to inactive state. At holo form, it was  
!37 shown that mutations introduced in the binding pocket change the ligand binding pose when compared to  
!38 the WT receptor (Figure 4, panels A). While ATS-C was mainly positioned between ECL2 and ECL3 at  
!39 WT receptor, it seemed that at mutant receptors the ligand moved more toward the funnel of the receptor.  
!40 It can be explained in part by the reduced steric clash in the binding pocket following the Ala substitution,  
!41 due to the smaller side chain of Ala compared to the substituted ones, that allow the ligand to move  
!42 deeper in the receptor orthosteric cavity.

!43 Following *in silico* studies, *in vitro* experiments were designed to validate the importance and significance of  
!44 binding pocket-residing residues. The mutant receptors along with the WT receptor were tested in FRET-  
!45 based G protein activation assay. Besides the point mutations, a combination of some of these point  
!46 mutations were generated as well, in order to investigate the collective effect of these residues in forming  
!47 stable contact with the ligand. In general, when receptor was mutated at the binding site, the dose-  
!48 response curve shifted toward the higher concentration and higher EC<sub>50</sub> values compared to that of WT  
!49 AstR-C (Figure 4, panel B and Table 2). The observed effect implied the importance of these binding  
!50 pocket residues in the activation of G proteins after coupling to the receptor. As expected, having more  
!51 than one mutation in the binding pocket of the receptor led to more pronounced effects in the increase of  
!52 EC<sub>50</sub> values. In addition, the maximum response of AstR-C for G protein activation was decreased by  
!53 almost 30% in double mutant receptors comparing to WT AstR-C further illustrating the significance of  
!54 these residues in forming the orthosteric pocket of AstR-C and ligand binding interactions. No G protein  
!55 activation was observed for Q271A mutant receptor. Overall, the results acquired here very well  
!56 supported the accuracy of the built model and the predicted binding pocket.

!57 **2.6. Q271A substitution.** No direct interaction between Q271 residue and AST-C was observed in MD  
!58 simulations of AstR-C and AST-C. However, *in silico* and *in vitro* analysis performed for the verification of  
!59 the identified binding pocket, showed the drastic effect of Q271A substitution on receptor activation.  
!60 Thus, we decided to investigate further the structural implication of this point mutation. First, we  
!61 confirmed the membrane localization of this mutant (Supplementary Figure S8). Eliminating the  
!62 possibility of not being localized in plasma membrane, we speculate that there are two possible scenarios  
!63 for the observed effect of Q271A on the activation of the receptor. First, the point mutation might  
!64 change the structure at apo form so that the ligand does not bind to the structure, and the second  
!65 possibility is that the ligand binds to the receptor, but the structure cannot go through the conformational  
!66 changes required for the G protein coupling and following activation. We tested both possibilities. MD  
!67 simulations were performed both in Apo and Holo forms, and it was checked to see if a new binding pose  
!68 could be obtained by CLusPro docking of mutated Apo form Q271A.

!69 Superimposition of WT receptor and mutants at apo form revealed a distinct conformation of TM6 and  
!70 ICL3 at mutant Q271A receptor, with more inwardly positioned TM6 and ICL3, suggesting a possible role  
!71 of this point mutation on the overall structure of the receptor halting the conformational changes required  
!72 for the activation. It is of note that all other receptor constructs including WT exploited similar  
!73 conformations in this region when compared to each other (Supplementary Figure S9). Internal  
!74 movements and displacements of the structures were more scrutinized by performing principle  
!75 component analysis (PCA) and dynamical cross-correlation analysis to the trajectories of 500-ns MD  
!76 simulations runs performed for WT and Q271A at apo and holo forms. First three principal components  
!77 (PCs) covered more than 60% of all the movements in all systems (Supplementary Figure S10).  
!78 Investigating the fluctuations of the structures in the first three PCs, it is obvious that Q271A mutation  
!79 reduces the internal movements, especially in the ICL3 (Supplementary Figure S11). Comparing the  
!80 eigenvalue magnitudes of PCs between WT and Q271A receptor, higher level of fluctuations was observed  
!81 in all forms of WT, and eigenvalue magnitudes of Q271A were significantly lower (Figure 5). GPCRs are  
!82 highly flexible allosteric proteins that their activation requires many conformational changes in the  
!83 structure following the ligand binding but as PC analysis revealed, Q271A mutant receptor has  
!84 considerably less internal motions that we speculated might be the underlying factor for the loss of  
!85 activation. The trajectories were also investigated with cross-correlation analysis. The dynamical cross-  
!86 correlation map (DCCM) showed that binding of the ligand to WT receptor results in the decrease in the  
!87 population of un-correlated motions, shown in blue (Figure 6). This is more obvious for residues of  
!88 ECL2, especially between 180 to 200 residues, in which our results showed their importance in protein-  
!89 ligand interactions. However, this trend was not observed for Q271A mutant receptor. In fact, for this  
!90 point mutation, the structure showed very different pattern of movement with si G<sub>s</sub>, the pattern was  
!91 drastically different from the WT receptor and especially in ECL2 no correlated movement was detected.  
!92 PCA and cross-correlation analysis together showed the internal motion changes that happens in the  
!93 structure of the receptor following Ala substitution at Q271<sup>6,55</sup>.

### !94 **3. Conclusions**

!95 Upon binding to their cognate receptors, ASTs inhibit the secretion of JH that, in turn, regulates the  
!96 downstream physiology in insect. Here, we conducted extensive *in silico* and *in vitro* studies to characterize  
!97 the structure and function of AstR-C of pine processionary moth, a predominant pest residing in  
!98 Mediterranean countries, South Europe, and North Africa. We derived the sequence of the receptor and  
!99 endogenous ligand, AstR-C and AST-C, from the WGS data sequenced and analyzed in our lab. G protein  
!00 recruitment and activation was observed via *T.pit* AstRC activation by sub-nanomolar concentrations of

AST-C. This was anticipated as AstR-C in insects are ortholog of somatostatin receptors that signal via Gi/o G-protein subtype<sup>28</sup>.  $\beta$ arrestin, as another downstream effector was shown to be recruited to the receptor at nanomolar ranges. We investigated the temporal kinetics of G protein dependent signaling in the recruitment and activation steps, and our results showed that at 1 nM concentration of AST-C, it takes 4.7 seconds for G protein complex to be recruited to the receptor, and 6.2 seconds be dissociated to  $G_{\alpha}$  and  $G_{\beta\gamma}$ . Compared to other GPCRs activated by small molecules, the acquired activation time is longer which can be attributed to the large size of the peptide ligand, AST-C, and its binding modes<sup>29, 30, 31, 32</sup>. Structural studies were resulted in a reliable 3D model of *T.pit* AstR-C and AST-C generated via homology modeling approaches. We then combined classic MD simulations and docking studies to predict the orthosteric pocket of the receptor. Investigating the trajectories obtained from multiple independent MD simulation runs, we identified residues of the receptor with main contribution in receptor-ligand interaction. In line with the literature of class A GPCRs, our results revealed the essential role of ECL2 in forming the binding cavity and ligand binding<sup>33</sup>. ECL3 was also involved to lower extent. The significance of some residues selected from ECL2 and ECL3 in the formation of orthosteric pocket and activation of *T.pit* AstR-C was validated by *in silico* and *in vitro* methods. As a result of these studies we identified a residue at position 6.55 (Q271), which has no direct interaction with the ligand but has a critical role in AstRC activation. Ala substitution at Q271<sup>6.55</sup> was found to be detrimental for the G protein activation pathway. Looking at atomic level, we showed that this mutation disrupts the internal movements of the receptor and changes the pattern of the correlated and un-correlated motions of residues when compared to the WT receptor. We attributed the significantly lower eigenvalues magnitudes of Q271A mutant at apo and holo forms to the lower level of flexibility in this mutated form, which in turn, blocks the conformational changes required for the GPCR activation. It is of note that a similar effect at the same position is reported by Change *et al.*<sup>34</sup>, in kappa opioid receptor ( $\kappa$ OR), where an Ala substitution disrupts the TM6 and ICL3 outward movements. Taken together, we believe that the characterization studies performed on the novel insect neuropeptide receptor, AstR-C of *T.pit*, and the structural and functional insights obtained here will positively contribute to the future studies aiming to exploit the potential of insect neuropeptide receptors in designing more environmentally friendly pest control agents.

## 4. Materials and Methods

**4.1. AstR-C and AST-C sequences.** The nucleotide sequence of AstR-C and AST-C were derived from the whole genome sequencing data of the insect performed by our group (*Thaumetopoea pityocampa* ASH\_NBICSL\_2017, accession number of the assembled genome: WUAW00000000). Protein sequences of AstR-C and AST-C of *Drosophila melanogaster* and *Helicoverpa armigera* were used as queries to search for their orthologs in the new assembly contigs of *T.pit*. Using these queries, NCBI-tblastn was performed at default parameters, with the only changes exerted in the E-value that was adjusted to  $10^{-3}$ . Smith-Waterman optimal alignments were achieved. A Perl script was used to collect and filter the hits. To obtain non-redundant orthologs additional filters including identity and coverage of higher than 50% were applied. Using the raw sequence reads, collected genes and fragments of genes were manually extended and curated. AUGUSTUS gene prediction tool<sup>18</sup> was used to identify 5'UTR and 3'UTR including introns. Nucleotide sequences were translated to protein and aligned with ortholog proteins of *Drosophila melanogaster* and *Helicoverpa armigera* in Clustal omega online tool<sup>35</sup>. The sequence of the receptor was checked in pfam<sup>36</sup> to determine the protein family of the receptor. Accordingly, conserved residues and motifs were investigated in the sequence. The prohormone sequence of AST-C was subjected to SignalP 5.1 version to obtain the mature peptide sequence<sup>37</sup>. N-terminus residues of AST-C peptides was modified (Glutamine to pyroglutamate). The modified version was synthesized by GenScript company.



145 Peptide was dissolved in 0.1% (w/v) bovine serum albumin (BSA)-containing 1X phosphate buffered  
146 saline (PBS). 0.1% (w/v) BSA-containing PBS was used as the vehicle treatment.

147 **4.2. Cell culture and transfection.** HEK-TSA cells were cultured in DMEM (PAN Biotech) containing  
148 4,5 g L<sup>-1</sup> Glucose, 10% FBS, 2 mM L-Glutamine, Penicillin (50 mg mL<sup>-1</sup>) and Streptomycin (50 mg mL<sup>-1</sup>)  
149 at 37 °C in 5% CO<sub>2</sub> incubator. Cells were routinely checked for mycoplasma contamination using  
150 MycoAlert<sup>TM</sup> Mycoplasma Detection Kit (Lonza). Cells were seeded in 6- or 10-cm cell culture dishes prior  
151 to transfection. Transfections were performed using Effectene Transfection Reagent (QIAGEN)  
152 according to the manufacturer's instruction.

153 **4.3. Immunocytochemistry and microscopy.** cDNA of *T.pit* was used to amplify AstR-C receptor using  
154 5'- XhoI ATGGAGCTCGAA -3' and 5'- HindIII GAGTCGCGAATG -3' primers. It was then cloned in  
155 pSYFP-N1 (4717bp) plasmid<sup>38</sup> to add YFP to the C-terminus of the receptor. This construct was named  
156 as AstRC-SYFP. HEK-TSA cells were seeded in 6-well plates on Poly-L-Lysine (PLL) (Sigma-Aldrich)-  
157 coated cover slips and transfected with AstRC-SYFP. Cells were washed once with pre-warmed 1X PBS  
158 24 hours after transfection and fixed with 1 ml ice-cold 4% paraformaldehyde for 20 minutes at room  
159 temperature, and then washed 3 times with warm 1X PBS. 1X CellMask (Thermo Fisher Scientific) and  
160 Hoechst 33342 Solution (Thermo Fisher Scientific) were used according to the manufacturer's protocols,  
161 in order to label the cell membrane and nucleus, respectively. Labeled cells on cover slips were mounted  
162 on glass slides using VectaShield Antifade Mounting Medium (Vector Laboratories). Samples were imaged  
163 using a Leica TSC SP8 confocal microscopy setup equipped with an HC PL APO 40x/1.30 Oil CS2  
164 objective. Localization of *T.pit* AstR-C was imaged via illumination of EYFP ( $\lambda_{ex}/\lambda_{em}$ : 514/518-580 nm),  
165 cell membrane was imaged via CellMask ( $\lambda_{ex}/\lambda_{em}$ : 649/655-700 nm) and the nuclei were imaged via  
166 Hoechst 33342 stain (UV laser,  $\lambda_{ex}/\lambda_{em}$ : 405/460-490 nm). Images were obtained with the LAS X  
167 software in a 1024 x 1024 pixel format, consisting of 4 averaged line scans. The scan speed was set to 400  
168 Hz and pinhole was set to Airy 1.

169 **4.4. G protein activation assay.** cDNA of the *T.pit* AstR-C receptor was amplified using 5'- HindIII  
170 ATGGAGCTCGAAGAC- 3' and 5'- BamHI TCAGAGTCGCGAAT-3' primers. The receptor was  
171 cloned in the mammalian expression vector, pcDNA3.1 plasmid (Invitrogen, V790-20). This construct will  
172 be referred as pc-AstR-C. Different FRET biosensors including G<sub>11</sub>, G<sub>12</sub>, G<sub>13</sub><sup>39</sup>, G<sub>q</sub><sup>40</sup>, G<sub>s</sub><sup>41</sup> and G<sub>13</sub><sup>42</sup> were  
173 used to measure the G protein activation. In these biosensors G<sub>α</sub> subunit is tagged with mTurquoise2 and  
174 G<sub>βγ</sub> is tagged with mVenus<sup>39</sup>. Constructs were transfected transiently to HEK-TSA cells. At 50–70%  
175 confluency, cells were transfected with pc-AstR-C and FRET biosensors. Twenty-four hours later, cells  
176 were reseeded in black-bottom 96-well plates (Corning) as 75.000 per well. Twenty-four hours after  
177 reseeded, cells were subjected to FRET measurement. Before the measurement, DMEM was substituted  
178 with HBSS, and then basal FRET ratio was measured in 90 μL buffer. Subsequently, 10 μL of 10-fold  
179 ligand solution or buffer (negative control) was applied to each well and the stimulated FRET ratio was  
180 recorded. All FRET experiments were conducted at 37 °C with a Synergy Neo2 plate reader (BioTEK)  
181 equipped with 420/50 nm excitation and 485/20 nm emission filters for CFP. Acceptor emission of YFP  
182 were detected with a 540/25 nm (FRET) filter.

183 **4.5. Temporal kinetics of G protein activation.** The same constructs and cell culture procedure as G  
184 protein activation assay was used. During the reseeded step, cells were transferred to Poly-L-Lysine-  
185 coated coverslips in 6-well cell culture dishes. 16 hours after re-seeding, coverslips were placed in a metal  
186 chamber, washed with PBS supplemented with HBSS. Kinetics measurements were performed on a Zeiss  
187 Axiovert 200 inverted microscope equipped with an oil immersion 63x objective lens and a dual-emission

188 photometric system. Ligand application during live FRET measurement was performed using a high-speed  
189 perfusion system (ValveLink 8.2, Automate Scientific). Cells were excited with light from a polychrome  
190 IV. Illumination was set to 40ms out of a total integration time of 100ms. Applying the excitation at  $436 \pm$   
191  $10$  nm (beam splitter DCLP 460 nm), CFP ( $480 \pm 20$  nm), YFP ( $535 \pm 15$  nm), and FRET ratio (YFP/  
192 CFP) signals were recorded at the same time (beam splitter DCLP 505 nm). Fluorescence signals were  
193 detected by photodiodes and digitalized by an analogue-digital converter (Digidata 1440A, Axon  
194 Instruments). All data were recorded on a PC running Clampex 10.3 software (Axon Instruments). To  
195 extract the exponential time constant,  $\tau$ , obtained traces were fit to a one component exponential decay  
196 function. The half-time of activation ( $t_{1/2}$ ) is defined as  $\tau \cdot \ln 2$ . In dynamic experiments, cells were  
197 stimulated with *T.pit* AST-C ligand.

198 **4.6. Kinetics of receptor/G protein interaction (G-protein recruitment).** AstRC-SYFP,  $G_{12}$  biosensor  
199 in which  $G_s$  was tagged with CFP were used for transient expression of the AstRC-SYFP and the G  
200 protein subunits.  $1.5 \times 10^6$  HEK-TSA cells were seeded onto a 55 mm dish and transfected 24 hours later.  
201 Kinetics measurements were performed as explained in “Temporal kinetics of G protein activation”.

202 **4.7.  $\beta$ arrestin recruitment assay.** AstRC-SYFP, GRK<sub>2</sub> (G protein receptor kinase 2) and  $\beta$ arrestin2-  
203 Nluc<sup>43</sup> were transfected to HEK-TSA cells. Cells were washed to substitute DMEM with the experimental  
204 buffer and incubated with the substrate of Nluc, furimazine (1:1000 of 90  $\mu$ L HBSS) for 2–5 min at 37 °C.  
205 Following the incubation step, the basal BRET ratio was measured. Then, 10  $\mu$ L of 10-fold ligand solution  
206 or buffer was applied to each well and the stimulated BRET ratio was recorded for 20 minutes. BRET  
207 experiments were performed at 37 °C with Synergy Neo2 (BioTEK) plate reader equipped with a 460/40  
208 nm filter to select the NanoLuc emission.

209 **4.8. Homology modeling.** SWISS-MODEL online tool (<https://swissmodel.expasy.org>)<sup>44</sup> was used to  
210 build tertiary structure of AstR-C. Different templates (PDB ID: 4N6H, 5C1M and 6DDE) with high  
211 sequence identity and similarity to AstR-C of *T.pit* were evaluated, and different models were built. The  
212 constructed models were primarily evaluated using the QMEAN<sup>44</sup> and Ramachandran plot. The  
213 acceptable models were then applied to 25-ns MD simulations, and RMSD and RMSF changes were  
214 monitored during the MD simulation time. N-terminus was built using I-TASSER webserver  
215 (<https://zhanglab.ccmb.med.umich.edu/I-TASSER>)<sup>45</sup> and added to the finally selected model. The  
216 ligand structure (AST-C) was also built using I-TASSER. The distance between the two Sulfur atoms of  
217 Cysteine residues were set to be kept at 2.05 Å in order to have the disulfide bond between these two  
218 residues. Five models were generated and the best one according to the C-score was chosen. C-score is at  
219 the range of [-5,2]. Bigger numbers show higher-quality models.

220 **4.9. Protein Preparation.** “Protein Preparation” module of the Maestro molecular modeling package  
221 (Schrödinger Suite 2017 Protein Preparation Wizard; Schrödinger, LLC, New York, 2017; Impact,  
222 Schrödinger, LLC, New York, 2017) was used to prepare both the receptor and ligand prior the MD  
223 simulations<sup>46</sup>. The protein refinement and minimization were performed in this step. Prime<sup>47</sup> module of  
224 Maestro (Prime, Schrödinger, LLC, New York, NY, 2017) was used to resolve any problem regarding the  
225 protein structure such as missing hydrogen atoms, side chains, loops or flipped residues. The protonation  
226 states at pH 7.4 was assigned using PROPKA<sup>48</sup>. OPLS2005 force field<sup>49</sup> was used for the minimization and  
227 optimization processes.

228 **4.10. System Preparation.**  $G_s$  part of  $G_i$  complex available at protein data bank (PDB) (PDB ID, 6DDE)  
229 was taken and aligned at the intracellular part of the receptor to be merged. To fill the gaps available in the  
230 resolved structure of  $G_s$ , “Crosslink Proteins” module of Schrödinger2015 (Schrödinger Release 2015-2:

131 Prime, S., LLC, New York, NY, 2015) was used. Simple *de novo* loop creation was chosen for the linker  
132 conformation prediction, and implicit solvent energy calculation of Prime module was selected for the  
133 energy calculation. The orientation of the constructed models for AstR-C in the membrane was adjusted  
134 using the Orientations of Proteins in Membrane (OPM) database<sup>50</sup>. The “Desmond System Builder”  
135 module of Maestro was used to set up the biological system which consists of solvent, membrane, counter  
136 ions and water. The protein was embedded in POPC (1-palmitoyl-2-oleoyl-sn-glycero-3-phosphocholine)  
137 lipid bilayer and TIP3P explicit water<sup>51</sup> was selected. 0.15 M NaCl was added to the system.

138 **4.11. Molecular Dynamics (MD) Simulations.** Desmond package was used for the MD simulations  
139 (Desmond Molecular Dynamics System, D. E. Shaw Research, New York, NY, 2017). OPLS 2005 force  
140 field<sup>49</sup> was used. The equilibration step was performed using the default algorithm of Desmond. The  
141 simulations were run at 300 K, which is the recommended temperature when using POPC lipid bilayer. To  
142 keep the temperature at 300 K and the pressure at 1.01325 bar, Nose-Hoover thermostat<sup>52</sup> and Martyna-  
143 Tobias-Klein method<sup>53</sup> were applied to the system. The particle mesh Ewald method<sup>54</sup> was applied to  
144 calculate the long-range electrostatic interactions. For both van der Waals and Coulombic interactions, a  
145 cut-off radius of 9.0 Å was used. The time-step was assigned as 2.0 fs. NP<sub>r</sub>T ensemble was used during the  
146 production step of MD simulations with surface tension of 4000 bar/Å as it is the recommended surface  
147 tension for NP<sub>r</sub>T ensemble. AstR-C/ST-C system was subjected to 500 ns MD simulation and three  
148 independent replica simulations were performed. The trajectory files collected during MD simulations  
149 were used for the analysis. RMSD and RMSF of the complexes were analyzed during the MD simulation  
150 time. 100 trajectory frames were recorded and MM-GBSA binding free energies of AST-C to AstR-C was  
151 calculated. VSGB 2.0 solvation model at Prime module of Maestro was utilized during MM/GBSA  
152 calculations.

153 **4.12. Molecular Docking Studies.** ClusPro web server<sup>55</sup> (<http://nrc.bu.edu/cluster>) was used for the  
154 docking studies. A mask file including the repulsion site was provided to the program. The contributing  
155 residues of the receptor in the ligand-protein interaction were evaluated by in “Ligand Interaction  
156 Diagram” of the Maestro package.

157 **4.13. *In silico* Binding Pocket Verification.** A representative structure with minimum RMSD value was  
158 selected from trajectories of 500-ns MD simulations done for apo AstR-C. The desired residues were  
159 substituted with Ala and mutant receptors were subjected to 200-ns MD simulations. Representative  
160 structure with the minimum RMSD value was chosen at each system and docking with the native ligand  
161 was applied. The best docking pose was selected, and two different systems were generated for 200-ns MD  
162 simulations. In the first one, the obtained pose was directly used in MD simulations. In the second  
163 approach, however, G<sub>s</sub> subunit was inserted in the intracellular interface of the receptor and then system  
164 was prepared for MD simulations. The effect of the mutations on the state (active, intermediate, and  
165 inactive) of the receptor was investigated measuring the  $\Delta d$  that is calculated as given in Equations 1-3.

166 
$$d_2 = (2 \times 41) \text{ to } (6 \times 38) \quad (1)$$

167 
$$d_1 = (3 \times 44) \text{ to } (7 \times 52) \quad (2)$$

168 
$$\Delta d = d_2 - d_1 \quad (3)$$

169  $d_1$  and  $d_2$  obtain by measuring the distance between specific residues. In the given formula, residues are  
170 specified by generic numbering offered by gpcrib. In AstR-C,  $d_2$  is the distance between M75<sup>2×41</sup> and  
171 L254<sup>6×38</sup> and  $d_1$  is the distance between C129<sup>3×49</sup> and L308<sup>7×52</sup>.  $\Delta d$  was measured along the MD simulation  
172 time using the “Simulation Event Analysis” module of Schrodinger.

173 **4.14. *In vitro* Binding Pocket Verification.** Q5® Site-Directed Mutagenesis Kit (NEB, Beverly, MA)  
174 was used to substitute the selected residues to Ala in the pc-AstR-C construct. G protein activation assay  
175 was performed to evaluate the effect of each substitution on the receptor activation.

176 **4.15. Principal Component Analysis (PCA).** Large-amplitude motions along MD simulations could be  
177 extracted using a dimensional reduction method called PCA. The details of algorithm and how to apply  
178 this method for MD simulations could be found in other papers<sup>56, 57, 58</sup>. In this study Bio3D package of  
179 Grant *et al.*<sup>59</sup> was utilized using R program. MD trajectories obtained from different independent replica  
180 simulations were concatenated to increase the number of conformations for protein. All the frames of  
181 trajectories were aligned with respect to an initial reference state before performing PCA to eliminate  
182 translational and rotational motions of protein and just to focus on internal fluctuations. Only alpha-C (C<sub>α</sub>)  
183 atoms of proteins were used for PCA to focus on backbone movements. Here, we have applied PCA for  
184 both AstR-C and G<sub>s</sub> protein separately. We have performed PCA for both WT and Q271A mutated  
185 systems, for which MD simulations was extended to 500-ns, to elucidate the effect of mutation in addition  
186 to determine the overall combined motions of proteins. Both holo and apo forms of systems were  
187 considered to elucidate the effect of ligand binding on receptor.

188 **4.16. Dynamics Cross Correlation Analysis.** The cross-correlation between atomic  
189 fluctuations/displacements are useful to provide information about the effect of mutations, ligand-binding  
190 etc. on the receptor/protein structure<sup>58</sup>. Here, Bio3D package in R program was used and C<sub>α</sub> atoms of  
191 proteins were utilized to focus on backbone of proteins. For both receptor AstR-C and G<sub>s</sub> proteins cross  
192 correlation analysis were performed in four different systems for which PCA also applied. Dynamic cross-  
193 correlation maps (DCCM) were plotted to visualize the correlation between residues in Bio3D package.

194 **4.17. Data Analysis and Visualization.** ImageJ (National Institute of Health) was used to analyze the  
195 raw microscopy images. Further processing of the data was done in Excel (Microsoft Office). All  
196 concentration-response data were fitted using nonlinear regression models with Prism 6 (GraphPad  
197 Software, San Diego, CA, USA). For each concentration, the response is normalized to the buffer only  
198 dataset. Visual Molecular Dynamics (VMD) software<sup>60</sup> was used for visualization and image generation.

199

200 **Accession codes.** The coding sequence of AstR-C and AST-C were deposited on GenBank under  
201 MN871948 and MT254058 accession number, respectively.

202

### 203 *Supporting Information Available*

204 This material is available free of charge via the Internet.

205

### 206 **Authors Information**

207

### 208 **Corresponding Authors**

209

210 **Necla Birgul-Iyison** - Department of Molecular Biology and Genetics, Bogazici University, 34342  
211 Bebek-Istanbul, Turkey ORCID 0000-0003-3511-3139

212 **Serdar Durdagi** - Department of Biophysics, School of Medicine, Bahcesehir University, Goztepe,  
213 Istanbul, Turkey ORCID 0000-0002-0426-0905

214



i15

## i16 **Authors**

i17

i18 **Aida Shahraki** - Department of Molecular Biology and Genetics, Bogazici University, 34342 Bebek-  
i19 Istanbul, Turkey ORCID 0000-0002-0507-8152

i20 **Ali Isbilir** - Max Delbrück Center for Molecular Medicine in Helmholtz Association, 13125, Berlin,  
i21 Germany & Institute of Pharmacology and Toxicology, University of Würzburg, Würzburg 97078,  
i22 Germany ORCID 0000-0002-9629-1150

i23 **Berna Dogan** - Department of Biophysics, School of medicine, Bahcesehir University, Goztepe, Istanbul,  
i24 Turkey ORCID 0000-0002-5650-5177

i25 **Martin J. Lohse** - Max Delbrück Center for Molecular Medicine in Helmholtz Association, 13125, Berlin,  
i26 Germany & Institute of Pharmacology and Toxicology, University of Würzburg, Würzburg 97078,  
i27 Germany & ISAR Bioscience Institute, Planegg/Munich, 82152, Germany ORCID 0000-0002-0599-3510

i28 **Serdar Durdagi** - Department of Biophysics, School of medicine, Bahcesehir University, Goztepe,  
i29 Istanbul, Turkey ORCID 0000-0002-0426-0905

i30 **Necla Birgul-Iyison** - Department of Molecular Biology and Genetics, Bogazici University, 34342  
i31 Bebek-Istanbul, Turkey ORCID 0000-0003-3511-3139

i32

## i33 **Notes**

i34 The authors declare no competing financial interest.

i35

## i36 **Abbreviations**

i37 AstR-C, allatostatin receptor type C; GPCRs, G protein-coupled receptors; AST-C, allatostatin C; JH,  
i38 Juvenile hormone; *T.pit*, *Thaumetopoea pityocampa*; WGS, whole genome sequencing; RET, Resonance energy  
i39 transfer; 3D, Three-dimensional; MD, molecular dynamics; ECL, extracellular loop; ICL, intracellular  
i40 loop; FRET, Förster resonance energy transfer; BRE'T, Bioluminescence resonance energy transfer; YFP,  
i41 yellow fluorescent protein; CFP, cyan fluorescent protein; C<sub>α</sub>, Carbon alpha; RMSD, root mean square  
i42 deviations; RMSF, root mean square fluctuations; Ala, Alanine; DCCM, dynamical cross-correlation map;  
i43 PDB, protein data bank; BSA, bovine serum albumin; PBS, phosphate buffered saline; MM/GBSA,  
i44 Molecular Mechanics/ Generalized Born Surface Area.

i45

## i46 **Acknowledgment**

i47 This study is supported by funding from TUBITAK-119Z921 (The Scientific and Technological Research  
i48 Council of Turkey) and COST ACTION ERNEST (Ernest CA18133).

i49

## i50 **References**

- i51 (1) Kramer, S. J.; Toschi, A.; Miller, C. A.; Kataoka, H.; Quistad, G. B.; Li, J. P.; Carney, R. L.;  
i52 Schooley, D. A. Identification of an Allatostatin from the Tobacco Hornworm *Manduca sexta*.  
i53 *Proc. Natl. Acad. Sci. U. S. A.* **1991**, *88* (21), 9458–9462. <https://doi.org/10.1073/pnas.88.21.9458>.
- i54 (2) Stay, B.; Tobe, S. S. The Role of Allatostatins in Juvenile Hormone Synthesis in Insects and  
i55 Crustaceans. *Annu. Rev. Entomol.* **2007**, *52* (1), 277–299.  
i56 <https://doi.org/10.1146/annurev.ento.51.110104.151050>.
- i57 (3) Flatt, T.; Tu, M. P.; Tatar, M. Hormonal Pleiotropy and the Juvenile Hormone Regulation of  
i58 *Drosophila* Development and Life History. *BioEssays* **2005**, *27* (10), 999–1010.  
i59 <https://doi.org/10.1002/bies.20290>.
- i60 (4) Tikhonova, I. G.; Gigoux, V.; Fourmy, D. Understanding Peptide Binding in Class A G Protein-  
i61 Coupled Receptors. *Mol. Pharmacol.* **2019**, *96* (5), 550–561.

- i62 <https://doi.org/10.1124/mol.119.115915>.
- i63 (5) Hanlon, C. D.; Andrew, D. J. Outside-in Signaling - A Brief Review of GPCR Signaling with a  
i64 Focus on the Drosophila GPCR Family. *J. Cell Sci.* **2015**, *128* (19), 3533–3542.  
i65 <https://doi.org/10.1242/jcs.175158>.
- i66 (6) Audsley, N.; Down, R. E. G Protein Coupled Receptors as Targets for next Generation Pesticides.  
i67 *Insect Biochem. Mol. Biol.* **2015**, *67*, 27–37. <https://doi.org/10.1016/j.ibmb.2015.07.014>.
- i68 (7) Wang, Z.; Zhou, W.; Hameed, M. S.; Liu, J.; Zeng, X. Characterization and Expression Profiling of  
i69 Neuropeptides and G-Protein-Coupled Receptors (GPCRs) for Neuropeptides in the Asian Citrus  
i70 Psyllid, *Diaphorina Citri* (Hemiptera: Psyllidae). *Int. J. Mol. Sci.* **2018**, *19* (12).  
i71 <https://doi.org/10.3390/ijms19123912>.
- i72 (8) Santos, H.; Rousselet, J.; Magnoux, E.; Paiva, M. R.; Branco, M.; Kerdelhué, C. Genetic Isolation  
i73 through Time: Allochronic Differentiation of a Phenologically Atypical Population of the Pine  
i74 Processionary Moth. *Proc. R. Soc. B Biol. Sci.* **2007**, *274* (1612), 935–941.  
i75 <https://doi.org/10.1098/rspb.2006.3767>.
- i76 (9) Lamy, M. Contact Dermatitis (Erucism) Produced by Processionary Caterpillars (Genus  
i77 *Thaumetopoea*). *J. Appl. Entomol.* **1990**, *110* (1–5), 425–437. <https://doi.org/10.1111/j.1439-0418.1990.tb00142.x>.
- i78
- i79 (10) Tiberi, R.; Bracalini, M.; Croci, F.; Tellini Florenzano, G.; Panzavolta, T. Effects of Climate on Pine  
i80 Processionary Moth Fecundity and on Its Egg Parasitoids. *Ecol. Evol.* **2015**, *5* (22), 5372–5382.  
i81 <https://doi.org/10.1002/ece3.1664>.
- i82 (11) Ballesteros JA, W. H. Integrated Methods for the Construction of Three-Dimensional Models and  
i83 Computational Probing of Structure-Function Relations in G Protein-Coupled Receptors. *Methods*  
i84 *Neurosci.* **1995**, *25*, 366–428.
- i85 (12) Clynen, E.; Huybrechts, J.; Verleyen, P.; De Loof, A.; Schoofs, L. Annotation of Novel  
i86 Neuropeptide Precursors in the Migratory Locust Based on Transcript Screening of a Public EST  
i87 Database and Mass Spectrometry. *BMC Genomics* **2006**, *7*, 1–15. <https://doi.org/10.1186/1471-2164-7-201>.
- i88
- i89 (13) Veenstra, J. A. Mono- and Dibasic Proteolytic Cleavage Sites in Insect Neuroendocrine Peptide  
i90 Precursors. *Arch. Insect Biochem. Physiol.* **2000**, *43* (2), 49–63. [https://doi.org/10.1002/\(SICI\)1520-6327\(200002\)43:2<49::AID-ARCH1>3.0.CO;2-M](https://doi.org/10.1002/(SICI)1520-6327(200002)43:2<49::AID-ARCH1>3.0.CO;2-M).
- i91
- i92 (14) Matthews, H. J.; Audsley, N.; Weaver, R. J. Alanine Substitution and Deletion Analogues of  
i93 *Manduca sexta* Allatostatin: Structure-Activity Relationship on the Spontaneous Contractions of  
i94 the Foregut of Larval *Lacanobia Oleracea*. *J. Insect Physiol.* **2006**, *52* (2), 128–135.  
i95 <https://doi.org/10.1016/j.jinsphys.2005.07.006>.
- i96 (15) Xu, G.; Gu, G. X.; Teng, Z. W.; Wu, S. F.; Huang, J.; Song, Q. S.; Ye, G. Y.; Fang, Q. Identification  
i97 and Expression Profiles of Neuropeptides and Their G Protein-Coupled Receptors in the Rice  
i98 Stem Borer *Chilo Suppressalis*. *Sci. Rep.* **2016**, *6* (November 2015), 1–15.  
i99 <https://doi.org/10.1038/srep28976>.
- i00 (16) Secher, T.; Lenz, C.; Cazzamali, G.; Sørensen, G.; Williamson, M.; Hansen, G. N.; Svane, P.;  
i01 Grimmelikhuijzen, C. J. P. Molecular Cloning of a Functional Allatostatin Gut/Brain Receptor and  
i02 an Allatostatin Preprohormone from the Silkworm *Bombyx Mori*. *J. Biol. Chem.* **2001**, *276* (50),  
i03 47052–47060. <https://doi.org/10.1074/jbc.M106675200>.
- i04 (17) Yang, J.; Zhang, Y. Protein Structure and Function Prediction Using I-TASSER. *Curr. Protoc.*  
i05 *Bioinforma.* **2015**, *52* (1), 5.8.1-5.8.15. <https://doi.org/10.1002/0471250953.bi0508s52>.
- i06 (18) Stanke, M.; Morgenstern, B. AUGUSTUS: A Web Server for Gene Prediction in Eukaryotes That  
i07 Allows User-Defined Constraints. *Nucleic Acids Res.* **2005**, *33* (SUPPL. 2), 465–467.  
i08 <https://doi.org/10.1093/nar/gki458>.
- i09 (19) Bylund, D. B.; Eikenberg, D. C.; Hieble, J. P.; Langer, S. Z.; Lefkowitz, R. J.; Minneman, K. P.;  
i10 Molinoff, P. B.; Ruffolo, R. R.; Trendelenburg, U. IV. International Union of Pharmacology  
i11 Nomenclature of Adrenoceptors. *Pharmacol. Rev.* **1994**, *46* (2), 121–136.
- i12 (20) Trzaskowski, B.; Latek, D.; Yuan, S.; Ghoshdastider, U.; Debinski, A.; Filipek, S. Action of  
i13 Molecular Switches in GPCRs - Theoretical and Experimental Studies. *Curr. Med. Chem.* **2012**, *19*

- i14 (8), 1090–1109. <https://doi.org/10.2174/092986712799320556>.
- i15 (21) Offermanns, S. G-Proteins as Transducers in Transmembrane Signalling. *Prog. Biophys. Mol. Biol.* **2003**, *83* (2), 101–130. [https://doi.org/10.1016/S0079-6107\(03\)00052-X](https://doi.org/10.1016/S0079-6107(03)00052-X).
- i16 (22) Salahpour, A.; Espinoza, S.; Masri, B.; Lam, V.; Barak, L. S.; Gainetdinov, R. R. BRET Biosensors
- i17 to Study GPCR Biology, Pharmacology, and Signal Transduction. *Front. Endocrinol. (Lausanne)*. **2012**,
- i18 *3* (AUG), 1–9. <https://doi.org/10.3389/fendo.2012.00105>.
- i19 (23) Hall, M. P.; Unch, J.; Binkowski, B. F.; Valley, M. P.; Butler, B. L.; Wood, M. G.; Otto, P.;
- i20 Zimmerman, K.; Vidugiris, G.; MacHleidt, T.; et al. Engineered Luciferase Reporter from a Deep
- i21 Sea Shrimp Utilizing a Novel Imidazopyrazinone Substrate. *ACS Chem. Biol.* **2012**, *7* (11), 1848–
- i22 1857. <https://doi.org/10.1021/cb3002478>.
- i23 (24) Koehl, A.; Hu, H.; Maeda, S.; Zhang, Y.; Qu, Q.; Paggi, J. M.; Latorraca, N. R.; Hilger, D.; Dawson,
- i24 R.; Matile, H.; et al. Structure of the  $\mu$ -Opioid Receptor-Gi Protein Complex. *Nature* **2018**, *558*
- i25 (7711), 547–552. <https://doi.org/10.1038/s41586-018-0219-7>.
- i26 (25) Shelke, A. R. , Roscoe, J. A. , Morrow, G. R. , Colman, L. K. , Banerjee, T. K. , & Kirshner, J. J. 基
- i27 因的改变 NIH Public Access. *Bone* **2008**, *23* (1), 1–7. <https://doi.org/10.1038/jid.2014.371>.
- i28 (26) Holleran, B. J.; Domazet, I.; Beaulieu, M. E.; Yan, L. P.; Guillemette, G.; Lavigne, P.; Escher, E.;
- i29 Leduc, R. Identification of Transmembrane Domain 6 & 7 Residues That Contribute to the
- i30 Binding Pocket of the Urotensin II Receptor. *Biochem. Pharmacol.* **2009**, *77* (8), 1374–1382.
- i31 <https://doi.org/10.1016/j.bcp.2009.01.013>.
- i32 (27) Tikhonova, I. G.; Poerio, E. Free Fatty Acid Receptors: Structural Models and Elucidation of
- i33 Ligand Binding Interactions Computational Analysis. *BMC Struct. Biol.* **2015**, *15* (1), 1–13.
- i34 <https://doi.org/10.1186/s12900-015-0044-2>.
- i35 (28) Csaba, Z.; Dournaud, P. Cellular Biology of Somatostatin Receptors. *Neuropeptides* **2001**, *35* (1), 1–
- i36 23. <https://doi.org/10.1054/npep.2001.0848>.
- i37 (29) Vilardaga, J.-P.; Bünemann, M.; Krasel, C.; Castro, M.; Lohse, M. J. Measurement of the
- i38 Millisecond Activation Switch of G Protein–Coupled Receptors in Living Cells. *Nat. Biotechnol.*
- i39 **2003**, *21* (7), 807–812. <https://doi.org/10.1038/nbt838>.
- i40 (30) Hoffmann, C.; Gaietta, G.; Bünemann, M.; Adams, S. R.; Oberdorff-Maass, S.; Behr, B.; Vilardaga,
- i41 J.-P.; Tsien, R. Y.; Ellisman, M. H.; Lohse, M. J. A FAsH-Based FRET Approach to Determine G
- i42 Protein-Coupled Receptor Activation in Living Cells. *Nat. Methods* **2005**, *2* (3), 171–176.
- i43 <https://doi.org/10.1038/nmeth742>.
- i44 (31) Rochais, F.; Vilardaga, J.-P.; Nikolaev, V. O.; Bünemann, M.; Lohse, M. J.; Engelhardt, S. Real-
- i45 Time Optical Recording of Beta1-Adrenergic Receptor Activation Reveals Supersensitivity of the
- i46 Arg389 Variant to Carvedilol. *J. Clin. Invest.* **2007**, *117* (1), 229–235.
- i47 <https://doi.org/10.1172/JCI30012>.
- i48 (32) Reiner, S.; Ambrosio, M.; Hoffmann, C.; Lohse, M. J. Differential Signaling of the Endogenous
- i49 Agonists at the Beta2-Adrenergic Receptor. *J. Biol. Chem.* **2010**, *285* (46), 36188–36198.
- i50 <https://doi.org/10.1074/jbc.M110.175604>.
- i51 (33) Peeters, M. C.; Van Westen, G. J. P.; Li, Q.; Ijzerman, A. P. Importance of the Extracellular Loops
- i52 in G Protein-Coupled Receptors for Ligand Recognition and Receptor Activation. *Trends Pharmacol.*
- i53 *Sci.* **2011**, *32* (1), 35–42. <https://doi.org/10.1016/j.tips.2010.10.001>.
- i54 (34) Cheng, J.; Sun, X.; Li, W.; Liu, G.; Tu, Y.; Tang, Y. Molecular Switches of the  $\mu$  Opioid Receptor
- i55 Triggered by 6'-GNTI and 5'-GNTI. *Sci. Rep.* **2016**, *6* (January), 1–10.
- i56 <https://doi.org/10.1038/srep18913>.
- i57 (35) McWilliam, H.; Li, W.; Uludag, M.; Squizzato, S.; Park, Y. M.; Buso, N.; Cowley, A. P.; Lopez, R.
- i58 Analysis Tool Web Services from the EMBL-EBI. *Nucleic Acids Res.* **2013**, *41* (W1), W597–W600.
- i59 <https://doi.org/10.1093/nar/gkt376>.
- i60 (36) El-Gebali, S.; Mistry, J.; Bateman, A.; Eddy, S. R.; Luciani, A.; Potter, S. C.; Qureshi, M.;
- i61 Richardson, L. J.; Salazar, G. A.; Smart, A.; et al. The Pfam Protein Families Database in 2019.
- i62 *Nucleic Acids Res.* **2019**, *47* (D1), D427–D432. <https://doi.org/10.1093/nar/gky995>.
- i63 (37) Henrik Nielsen. Predicting Secretory Proteins with SignalP. *Methods Mol. Biol.* **2017**, *1611* (59), 73.
- i64 <https://doi.org/10.1007/978-1-4939-7015-5>.
- i65

- i66 (38) Kremers, G. J.; Goedhart, J.; Van Munster, E. B.; Gadella, T. W. J. Cyan and Yellow Super  
i67 Fluorescent Proteins with Improved Brightness, Protein Folding, and FRET Förster Radius.  
i68 *Biochemistry* **2006**, *45* (21), 6570–6580. <https://doi.org/10.1021/bi0516273>.
- i69 (39) Van Unen, J.; Stumpf, A. D.; Schmid, B.; Reinhard, N. R.; Hordijk, P. L.; Hoffmann, C.; Gadella, T.  
i70 W. J.; Goedhart, J. A New Generation of FRET Sensors for Robust Measurement of  $G\alpha_1$ ,  $G\alpha_2$   
i71 and  $G\alpha_3$  Activation Kinetics in Single Cells. *PLoS One* **2016**, *11* (1), 1–14.  
i72 <https://doi.org/10.1371/journal.pone.0146789>.
- i73 (40) Adjobo-Hermans, M. J. W.; Goedhart, J.; van Weeren, L.; Nijmeijer, S.; Manders, E. M. M.;  
i74 Offermanns, S.; Gadella, T. W. J. Real-Time Visualization of Heterotrimeric G Protein Gq  
i75 Activation in Living Cells. *BMC Biol.* **2011**, *9*. <https://doi.org/10.1186/1741-7007-9-32>.
- i76 (41) Hein, P.; Rochais, F.; Hoffmann, C.; Dorsch, S.; Nikolaev, V. O.; Engelhardt, S.; Berlot, C. H.;  
i77 Lohse, M. J.; Bünemann, M. GS Activation Is Time-Limiting in Initiating Receptor-Mediated  
i78 Signaling. *J. Biol. Chem.* **2006**, *281* (44), 33345–33351. <https://doi.org/10.1074/jbc.M606713200>.
- i79 (42) Mastop, M.; Reinhard, N. R.; Zuconelli, C. R.; Terwey, F.; Gadella, T. W. J.; Van Unen, J.; Adjobo-  
i80 Hermans, M. J. W.; Goedhart, J. A FRET-Based Biosensor for Measuring  $G\alpha_{13}$  Activation in  
i81 Single Cells. *PLoS One* **2018**, *13* (3), 1–19. <https://doi.org/10.1371/journal.pone.0193705>.
- i82 (43) Rohman, M.; Wingfield, J. Chapter 3 within Drug Discovery. *New York* **2016**, *1439*, 47–63.  
i83 <https://doi.org/10.1007/978-1-4939-3673-1>.
- i84 (44) Benkert, P.; Tosatto, S. C. E.; Schomburg, D. QMEAN: A Comprehensive Scoring Function for  
i85 Model Quality Assessment. *Proteins Struct. Funct. Genet.* **2008**, *71* (1), 261–277.  
i86 <https://doi.org/10.1002/prot.21715>.
- i87 (45) Yang, J.; Zhang, Y. I-TASSER Server: New Development for Protein Structure and Function  
i88 Predictions. *Nucleic Acids Res.* **2015**, *43* (W1), W174–W181. <https://doi.org/10.1093/nar/gkv342>.
- i89 (46) Madhavi Sastry, G.; Adzhigirey, M.; Day, T.; Annabhimoju, R.; Sherman, W. Protein and Ligand  
i90 Preparation: Parameters, Protocols, and Influence on Virtual Screening Enrichments. *J. Comput.*  
i91 *Aided. Mol. Des.* **2013**, *27* (3), 221–234. <https://doi.org/10.1007/s10822-013-9644-8>.
- i92 (47) Jacobson, M. P.; Pincus, D. L.; Rapp, C. S.; Day, T. J. F.; Honig, B.; Shaw, D. E.; Friesner, R. A. A  
i93 Hierarchical Approach to All-Atom Protein Loop Prediction. *Proteins Struct. Funct. Genet.* **2004**, *55*  
i94 (2), 351–367. <https://doi.org/10.1002/prot.10613>.
- i95 (48) Bas, D. C.; Rogers, D. M.; Jensen, J. H. Very Fast Prediction and Rationalization of PKa Values for  
i96 Protein-Ligand Complexes. *Proteins Struct. Funct. Genet.* **2008**, *73* (3), 765–783.  
i97 <https://doi.org/10.1002/prot.22102>.
- i98 (49) Damm, W.; Frontera, A.; Tirado-Rives, J.; Jorgensen, W. L. OPLS All-Atom Force Field for  
i99 Carbohydrates. *J. Comput. Chem.* **1997**, *18* (16), 1955–1970. [https://doi.org/10.1002/\(SICI\)1096-987X\(199712\)18:16<1955::AID-JCC1>3.0.CO;2-L](https://doi.org/10.1002/(SICI)1096-987X(199712)18:16<1955::AID-JCC1>3.0.CO;2-L).
- '00 (50) Lomize, M. A.; Pogozheva, I. D.; Joo, H.; Mosberg, H. I.; Lomize, A. L. OPM Database and PPM  
'01 Web Server: Resources for Positioning of Proteins in Membranes. *Nucleic Acids Res.* **2012**, *40* (D1),  
'02 370–376. <https://doi.org/10.1093/nar/gkr703>.
- '03 (51) Jorgensen, W. L.; Chandrasekhar, J.; Madura, J. D.; Impey, R. W.; Klein, M. L. Comparison of  
'04 Simple Potential Functions for Simulating Liquid Water. *J. Chem. Phys.* **1983**, *79* (2), 926–935.  
'05 <https://doi.org/10.1063/1.445869>.
- '06 (52) Hoover, W. G. Canonical Dynamics: Equilibrium Phase-Space Distributions. *Phys. Rev. A* **1985**.  
'07 <https://doi.org/10.1103/PhysRevA.31.1695>.
- '08 (53) Martyna, G. J.; Tobias, D. J.; Klein, M. L. Constant Pressure Molecular Dynamics Algorithms. *J.*  
'09 *Chem. Phys.* **1994**, *101* (5), 4177. <https://doi.org/10.1063/1.467468>.
- '10 (54) Essmann, U.; Perera, L.; Berkowitz, M. L.; Darden, T.; Lee, H.; Pedersen, L. G. A Smooth Particle  
'11 Mesh Ewald Method. *J. Chem. Phys.* **1995**, *103* (19), 8577–8593. <https://doi.org/10.1063/1.470117>.
- '12 (55) Comeau, S. R.; Gatchell, D. W.; Vajda, S.; Camacho, C. J. ClusPro: A Fully Automated Algorithm  
'13 for Protein-Protein Docking. *Nucleic Acids Res.* **2004**, *32* (WEB SERVER ISS.), 96–99.  
'14 <https://doi.org/10.1093/nar/gkh354>.
- '15 (56) Stein, S. A. M.; Loccisano, A. E.; Firestine, S. M.; Evanseck, J. D. Chapter 13 Principal Components  
'16 Analysis: A Review of Its Application on Molecular Dynamics Data. *Annu. Rep. Comput. Chem.* **2006**,  
'17



- '18 2 (C), 233–261. [https://doi.org/10.1016/S1574-1400\(06\)02013-5](https://doi.org/10.1016/S1574-1400(06)02013-5).
- '19 (57) Haider, S.; Parkinson, G. N.; Neidle, S. Molecular Dynamics and Principal Components Analysis of  
'20 Human Telomeric Quadruplex Multimers. *Biophys. J.* **2008**, *95* (1), 296–311.  
'21 <https://doi.org/10.1529/biophysj.107.120501>.
- '22 (58) Salmas, R. E.; Yurtsever, M.; Durdagi, S. Investigation of Inhibition Mechanism of Chemokine  
'23 Receptor CCR5 by Micro-Second Molecular Dynamics Simulations. *Sci. Rep.* **2015**, *5* (January), 1–  
'24 12. <https://doi.org/10.1038/srep13180>.
- '25 (59) Grant, B. J.; Rodrigues, A. P. C.; ElSawy, K. M.; McCammon, J. A.; Caves, L. S. D. Bio3d: An R  
'26 Package for the Comparative Analysis of Protein Structures. *Bioinformatics* **2006**, *22* (21), 2695–2696.  
'27 <https://doi.org/10.1093/bioinformatics/btl461>.
- '28 (60) William Humphrey, Andrew Dalke, and K. S. VMD: Visual Molecular Dynamics. *J. Mol. Graph.*  
'29 **1996**, *14*, 33–38.  
'30

'31

'32

'33

'34

'35

'36

'37

'38

'39

'40

'41

'42

'43

'44

'45

'46

'47

'48

'49

'50

'51

'52

'53

'54

'55

'56

## Tables

'57

**Table 1.**  $\Delta d$  values and state of structure for WT and mutant receptors at Apo and Holo forms

'58

(with/without  $G\alpha$ ).

| <b>Apo</b><br>(Å)                                   | WT                | D181A        | N182A             | N188A             | E193A        | Q200A             | Q271A             | Q278A             |
|-----------------------------------------------------|-------------------|--------------|-------------------|-------------------|--------------|-------------------|-------------------|-------------------|
| $d_2$                                               | 21.7±<br>0.9      | 19.3±0.<br>6 | 19.5±0.<br>7      | 22.5±0.<br>8      | 22.7±0.<br>5 | 18.7±1.<br>2      | 21.9±0.<br>7      | 23.2±0.<br>5      |
| $d_1$                                               | 18.3±<br>0.9      | 20.4±0.<br>7 | 21.0±0.<br>9      | 15.4±0.<br>5      | 14.5±0.<br>5 | 15.6±0.<br>6      | 15.3±0.<br>5      | 14.2±0.<br>5      |
| $\Delta d$                                          | 3.4               | -1.04        | -1.44             | 7.09              | 8.2          | 3.08              | 6.6               | 9.38              |
| State                                               | Inter-<br>mediate | Inactive     | Inactive          | Inter-<br>mediate | Active       | Inter-<br>mediate | Inter-<br>mediate | Active            |
| <b>Holo</b><br>(Å)                                  | WT                | D181A        | N182A             | N188A             | E193A        | Q200A             | Q271A             | Q278A             |
| $d_2$                                               | 21.5±<br>0.9      | 24.6±1.<br>1 | 24.5±1.<br>5      | 25.5±1.<br>5      | 22.8±0.<br>9 | 27.6±1.<br>4      | 21.3±0.<br>6      | 22.6±0.<br>8      |
| $d_1$                                               | 14.6±<br>0.6      | 14.1±0.<br>4 | 14.5±0.<br>9      | 14.6±0.<br>9      | 14.3±0.<br>5 | 18.2±1.<br>0      | 19.5±0.<br>7      | 17.6±0.<br>6      |
| $\Delta d$                                          | 6.9               | 10.15        | 5.0               | 10.8              | 8.4          | 9.4               | 1.8               | 4.9               |
| State                                               | Inter-<br>mediate | Active       | Inter-<br>mediate | Active            | Active       | Active            | Inactive          | Inter-<br>mediate |
| <b>Holo</b><br><b>(<math>G\alpha</math>)</b><br>(Å) | WT                | D181A        | N182A             | N188A             | E193A        | Q200A             | Q271A             | Q278A             |
| $d_2$                                               | 23.5±<br>0.9      | 21.4±0.<br>7 | 22.4±0.<br>5      | 25.1±1.<br>0      | 22.1±0.<br>4 | 22.7±0.<br>8      | 21.5±0.<br>5      | 21.5±0.<br>6      |
| $d_1$                                               | 12.0±<br>0.5      | 15.5±0.<br>5 | 14.2±0.<br>3      | 14.9±0.<br>5      | 13.7±0.<br>3 | 19.1±1.<br>0      | 18.2±0.<br>6      | 17.5±0.<br>6      |

|            |        |                   |        |        |        |                   |                   |                   |
|------------|--------|-------------------|--------|--------|--------|-------------------|-------------------|-------------------|
| $\Delta d$ | 11.5   | 5.8               | 8.2    | 10.5   | 8.4    | 3.6               | 3.3               | 4.0               |
| State      | Active | Inter-<br>mediate | Active | Active | Active | Inter-<br>mediate | Inter-<br>mediate | Inter-<br>mediate |

'59

'60

**Table 2.**  $EC_{50}$  and  $R^2$  values of WT and mutant AstR-C compared to WT.

| Receptor Constructs | $EC_{50}$ (nM) | $R^2$ (Goodness of fit) |
|---------------------|----------------|-------------------------|
| WT                  | 0.057          | 0.89                    |
| D181A               | 0.053          | 0.77                    |
| N188A               | 0.39           | 0.95                    |
| Q271A               | -              | 0.25                    |
| Q278A               | 0.40           | 0.91                    |
| D181A & N182A       | 0.13           | 0.93                    |
| N188A & Q278A       | 7.20           | 0.94                    |

'61

'62

'63

'64

'65

'66

'67

'68

'69

'70

'71

'72

'73

'74

'75

'76

'77

'78

'79

'80

'81

'82 **Figures**

'83

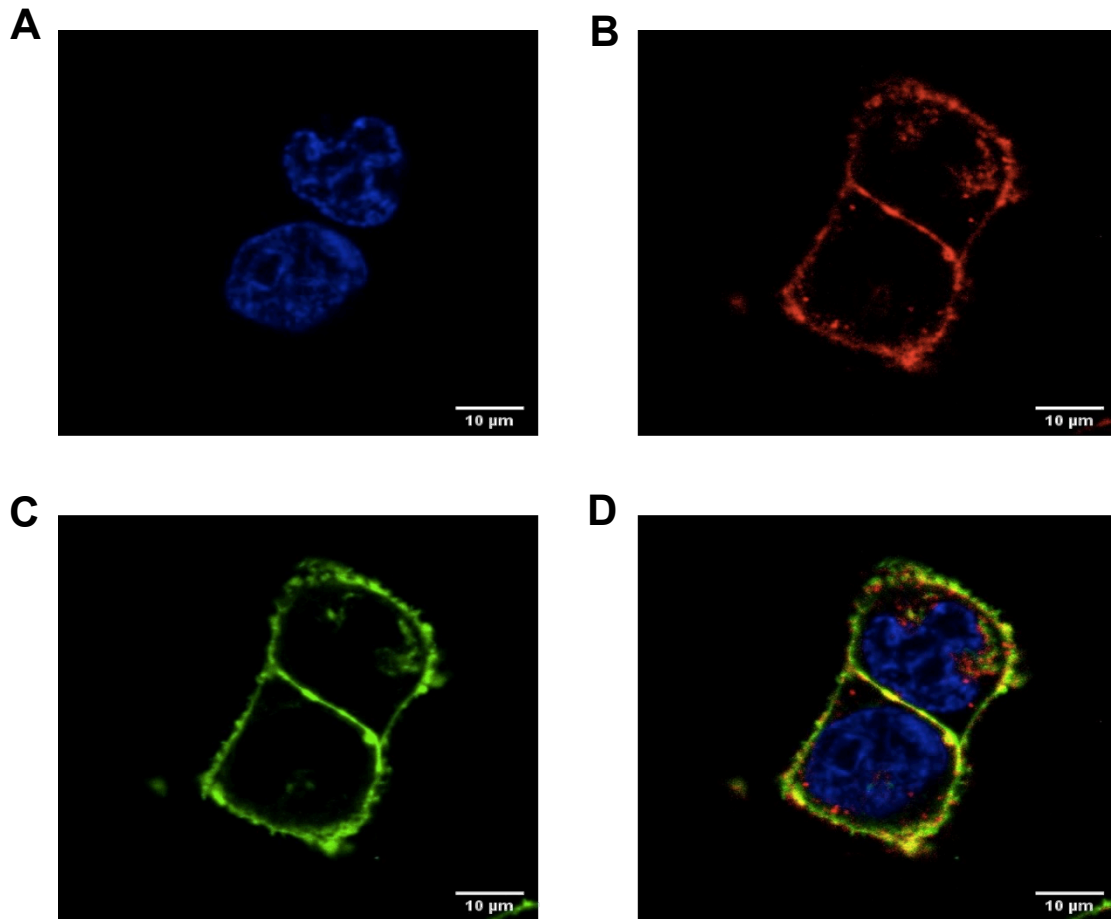

'84

'85 **Figure 1. Cell localization of *T.pit* AstR-C.** Confocal microscopy images of HEK-TSA cells transfected  
'86 with AstRC-SYFP. (A) Nuclei is stained with Hoechst 33258 (blue). (B) Plasma membrane is stained with  
'87 CellMask™ Deep red (red). (C) *T.pit* AstR-C (green). (D) Merged image obtained from the overlay of  
'88 three images.



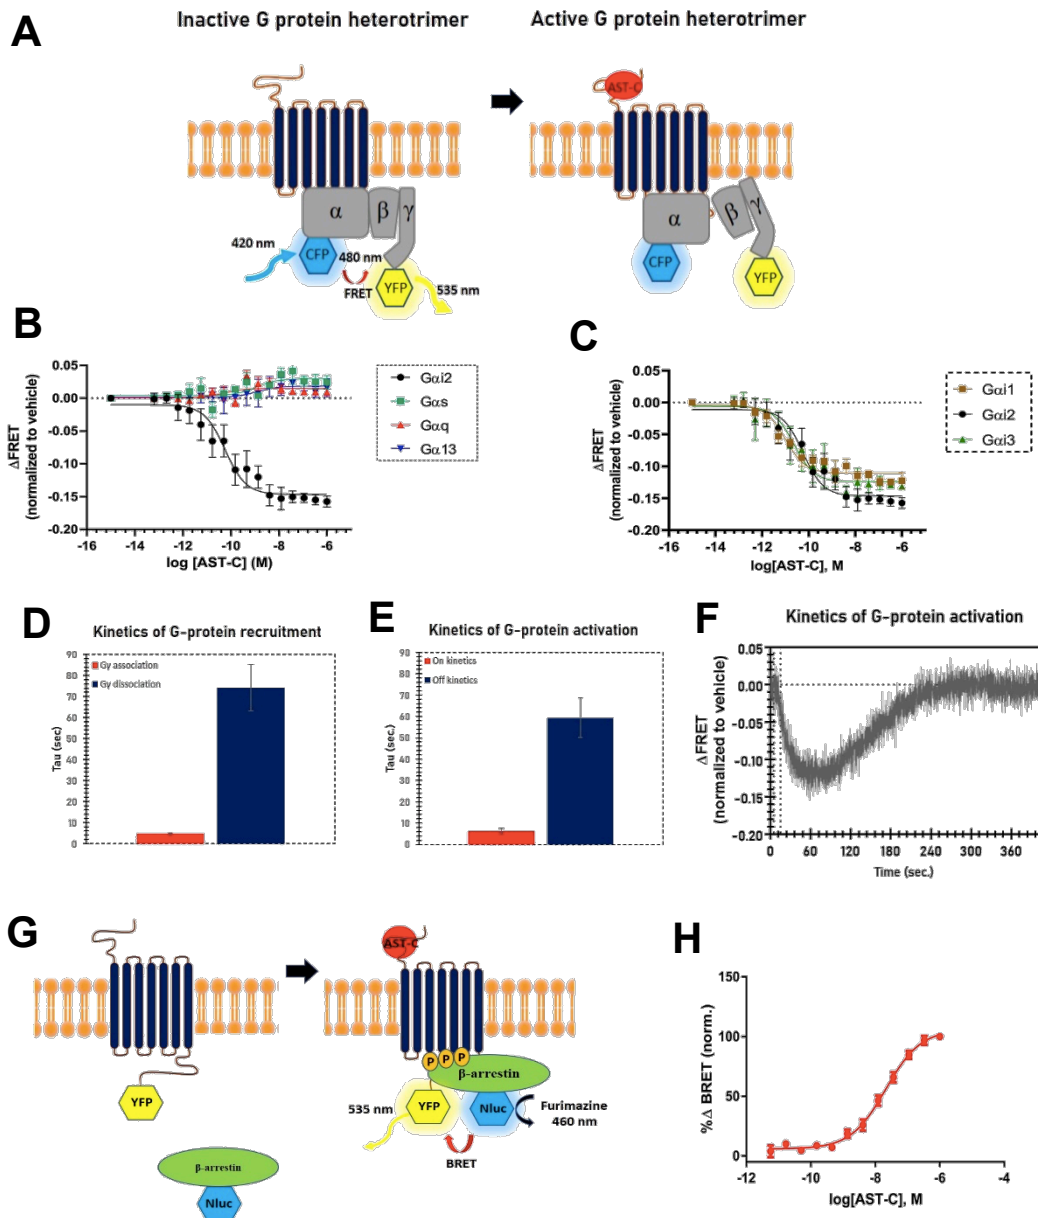

789

790 **Figure 2. Downstream effectors of *T.pit* AstR-C.** (A) Schematic representation of G-protein activation  
 791 assay. (B) G protein activation of *T.pit* AstR-C in response to increasing concentrations of AST-C when  
 792 different biosensors are transiently transfected. (C)  $G_i$  activation of the receptor in response to increasing  
 793 concentrations of AST-C. (D) Kinetics of G-protein recruitment when *T.pit* AstR-C-SYFP and  $G_{i2}$  sensor  
 794 are transiently transfected in the presence of 1 nM AST-C ligand. (E) Kinetics of G-protein activation  
 795 when *T.pit* AstR-C-WT and  $G_{i2}$  sensor are transiently transfected in the presence of 1 nM AST-C ligand.  
 796 (F) A representative trace of FRET response from a single HEK-TSA cell. (G) Schematic representation  
 797 of  $\beta$ arrestin recruitment assay. (H)  $\beta$ arrestin recruitment to *T.pit* AstR-C in response to increasing  
 798 concentrations of AST-C. Results from each 96-well plate experiment were normalized to max-min values  
 799 from the same plate. Data was fit to Hill equation, using the four-parameter dose-response fit function of  
 800 GraphPad Prism6. The presented data is representative for at least three different transfections performed  
 801 on three experimental days. The error bars represent standard deviation (SD). Values of the bar graphs in  
 802 the kinetics measurements are the average of data obtained from four cells and at least 3 independent  
 803 experiment days. Values of the bar graphs in the dose response curves are the average of data obtained  
 804 from at least three independently conducted experiments.

305  
306  
307  
308

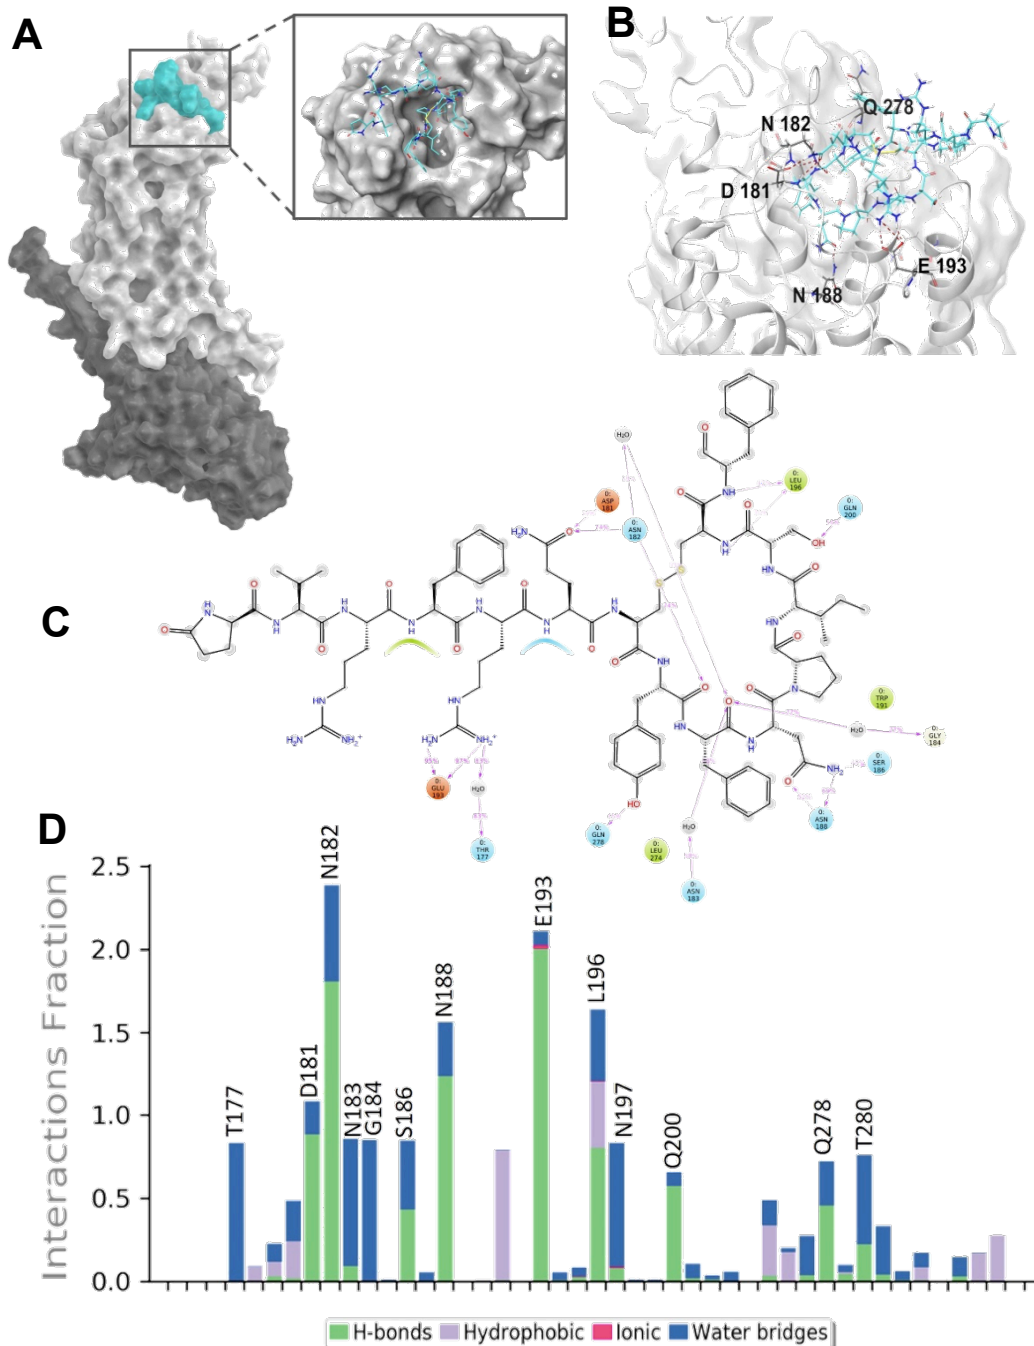

309

310 **Figure 3. MD Simulation interaction analysis.** (A) Surface representation of AST-C (colored  
311 Turquoise) at the binding pocket of AstR-C, represented in light gray. G is depicted in dark gray. (B) 3D  
312 ligand interactions diagram of AST-C at the binding site of AstR-C. (C) 2D representation of Protein-  
313 Ligand interaction. Residues of the receptor surrounding the ligand are represented with different colors  
314 each showing the type of the interaction. (D) Protein-Ligand interaction fraction diagram. Stacked bars

315 show the type of the interactions each residue of the receptor makes with ligand during the MD simulation  
316 time. Residues are with interaction fraction value higher than 0.5 are specified.

317

318

319

320

321

322

323

324

325

326

327

328

329

330

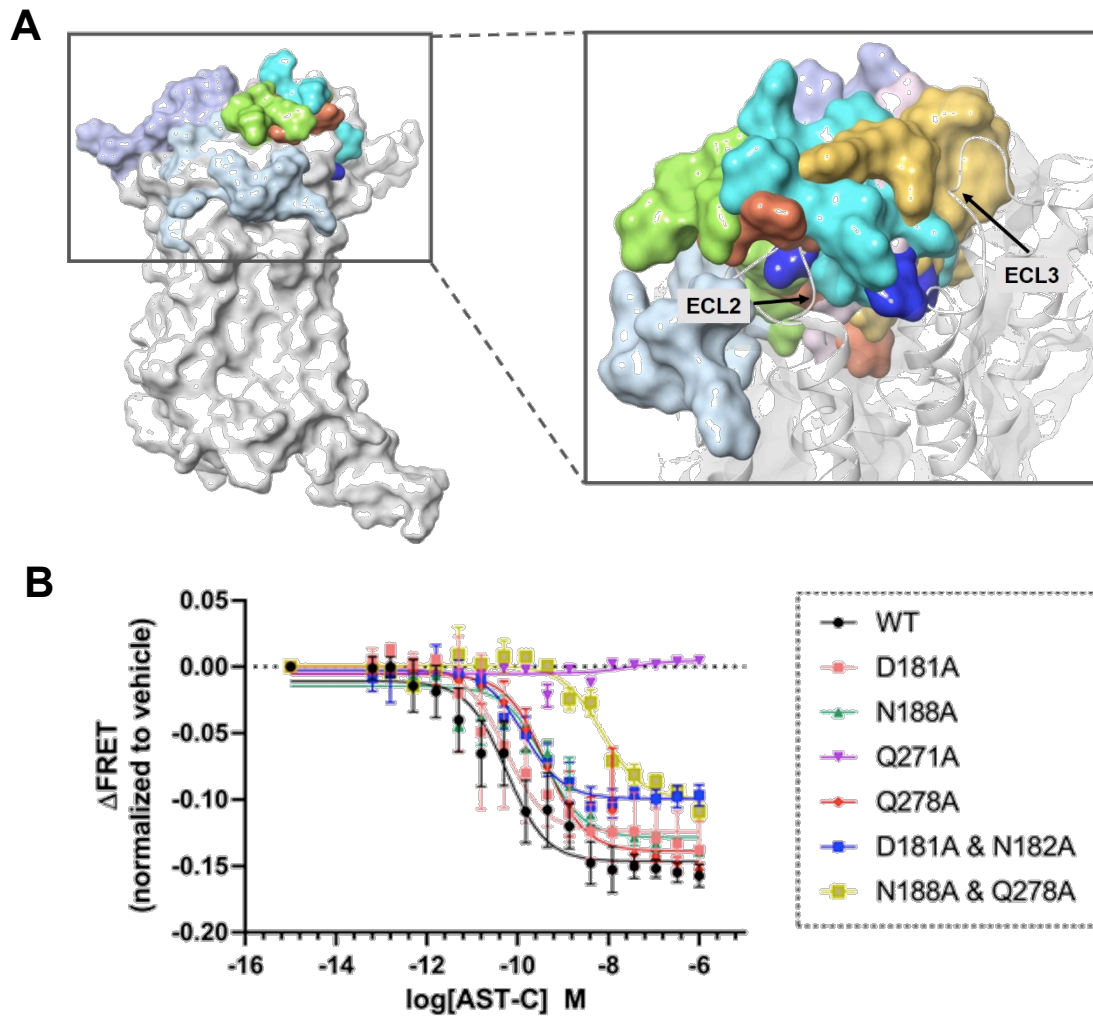

331

332 **Figure 4. *In silico* and *in vitro* verification of the orthosteric pocket.** (A) Effect of point mutations on  
333 the binding pose of AST-C was shown by superimposing receptors (WT and mutants) in holo form  
334 system. AST-C in WT is shown in turquoise. (B) Effect of mutations on dose-dependent G protein  
335 activation of *T.pit* AstR-C. The changes in FRET signal of mutant AstR-C were measured and compared  
336 with WT AstR-C upon the application of different doses of AST-C ligand. The data was fit to Hill  
337 equation, using the four-parameter dose-response fit function of GraphPad Prism6. The presented data is  
338 representative for at least three different transfections performed on three experimental days.

339

340

341

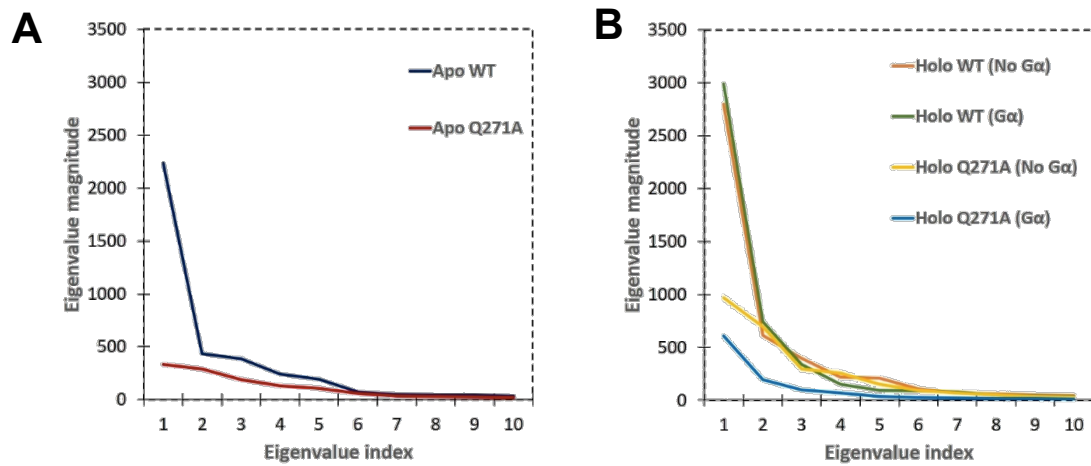

342

343 **Figure 5. Eigenvalue magnitudes.** Analysis of Eigenvalues corresponding to eigenvalue indexes for of  
344 the first 10 modes of action of (A) WT and, (B) Q271A receptors at different states.

345

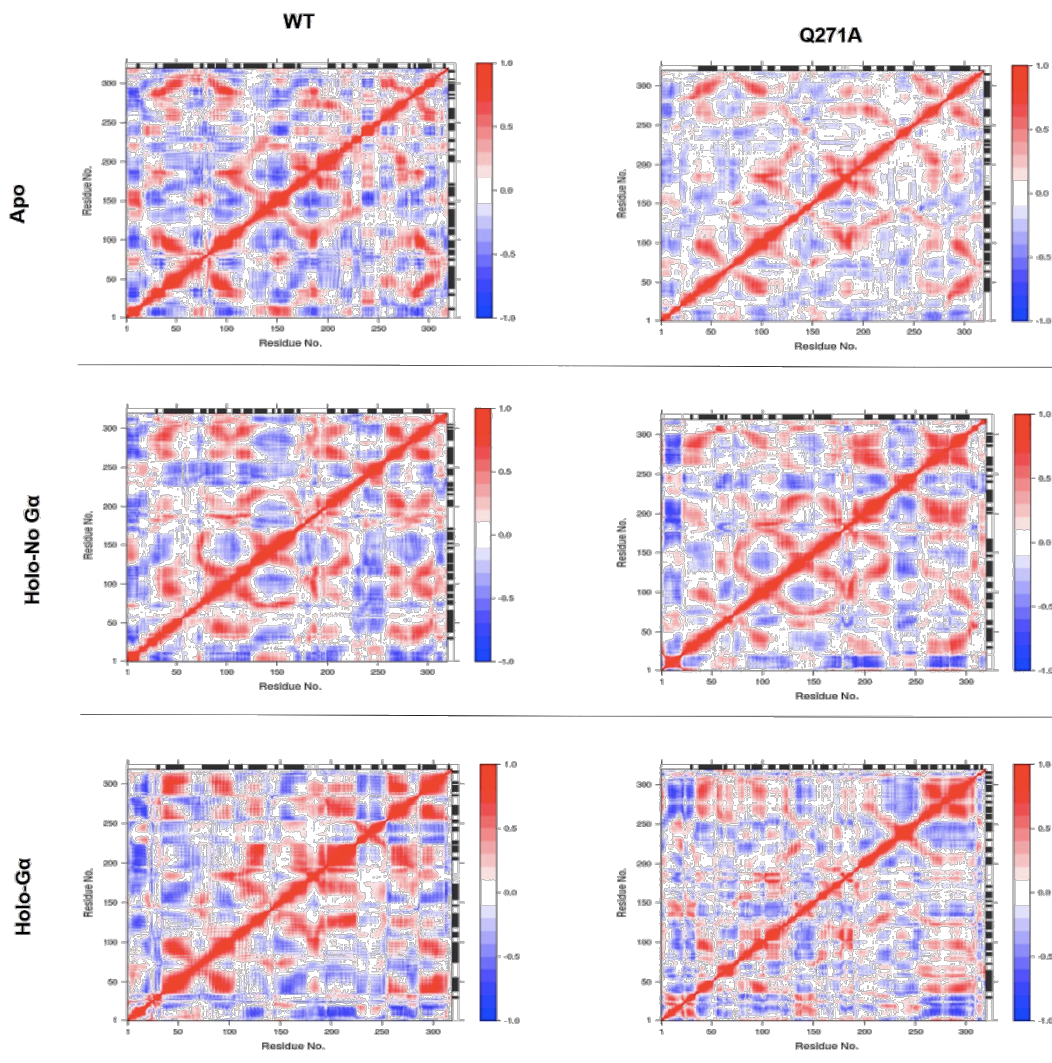

346

347 **Figure 6. Dynamical cross-correlation map.** Correlated (red) and un-correlated (blue) displacements  
348 were compared between WT and Q271A receptor at different states.

349





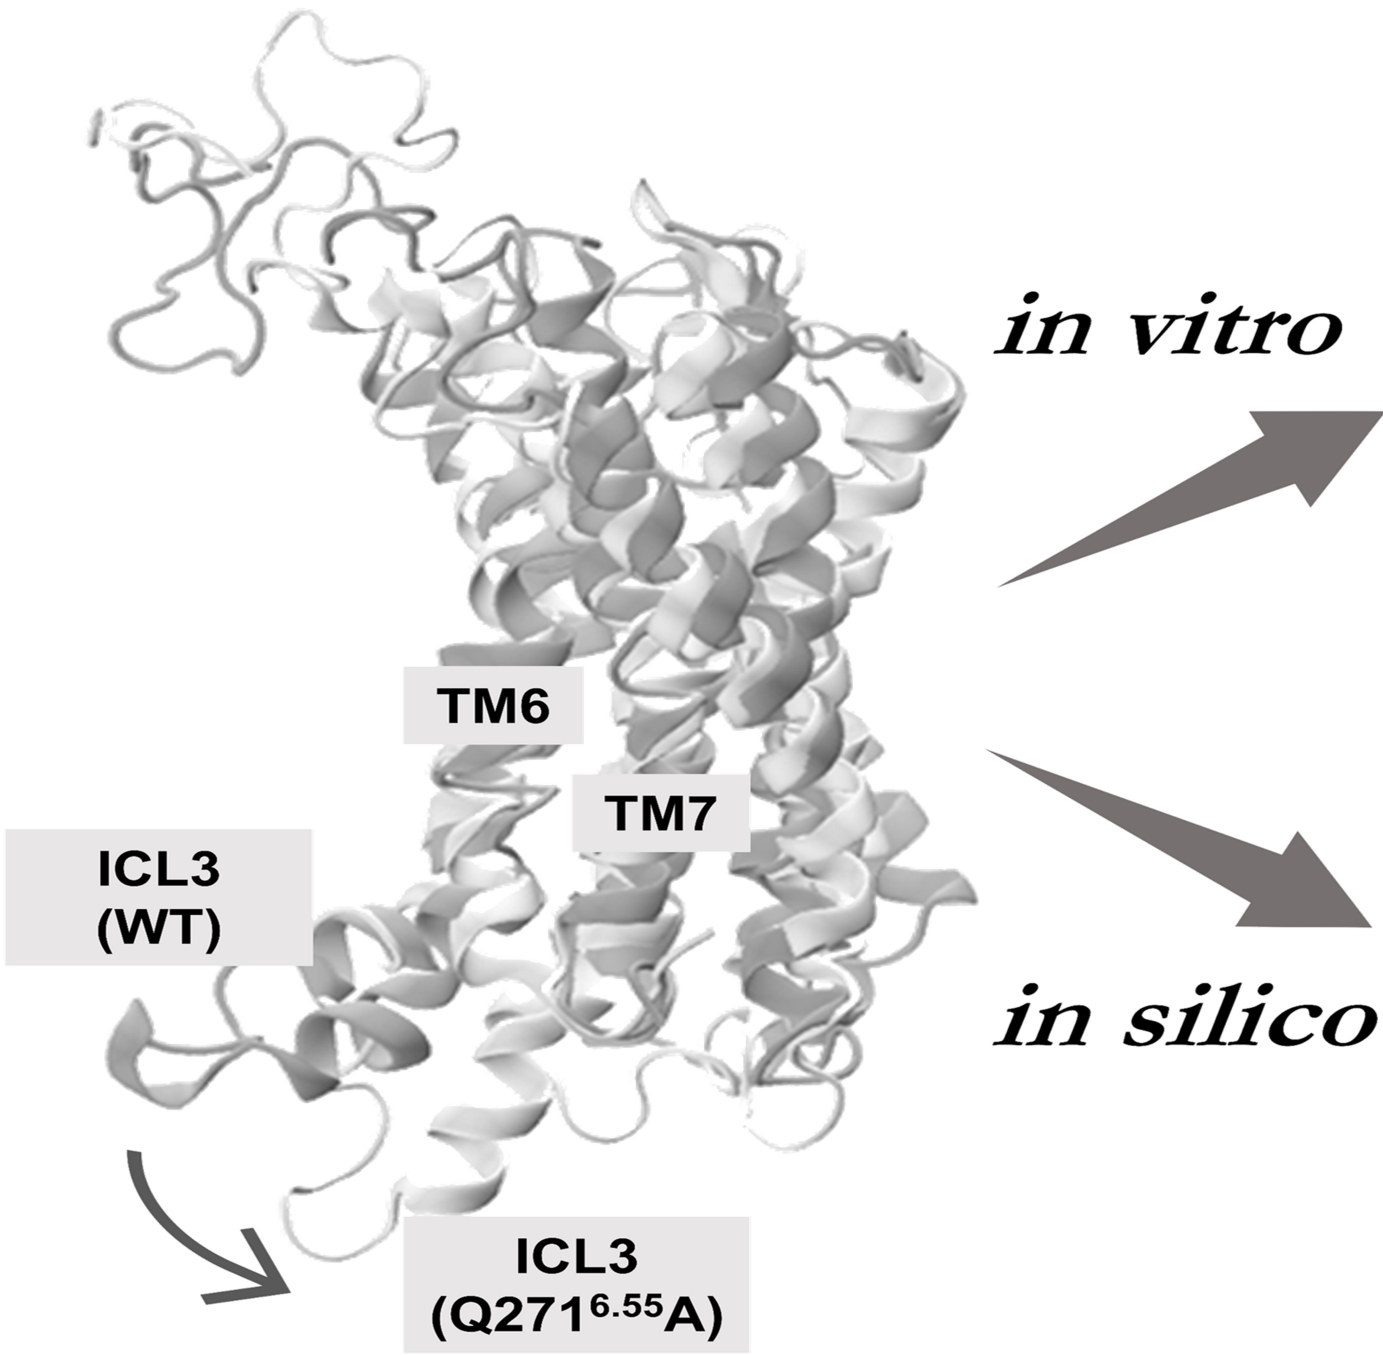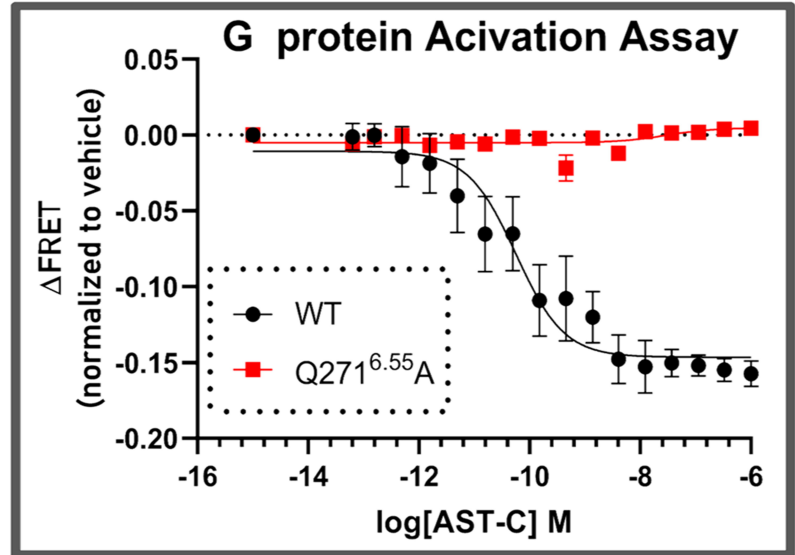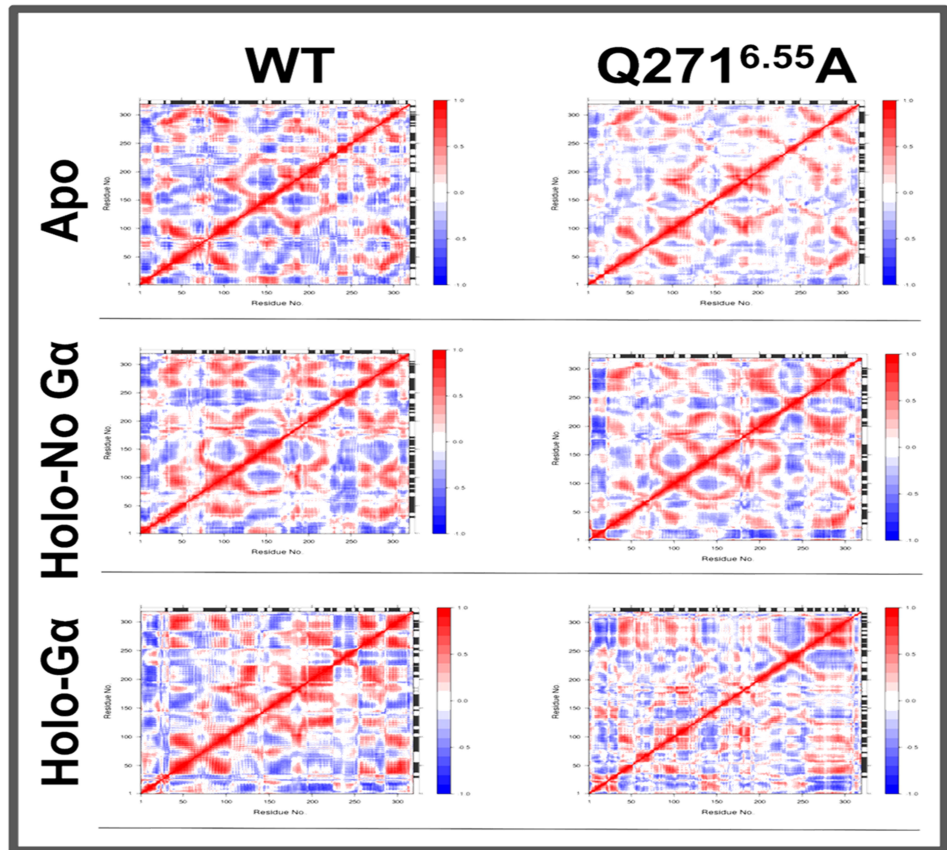

Source: https://www.biorxiv.org/content/10.1101/2020.07.01.174037v1.full.pdf
